# Supplementary material for: Discovery of novel β-elemene hybrids with hydrogen sulfide-releasing moiety possessing cardiovascular protective activity for the treatment of atherosclerosis
Source: Royal Society of Chemistry journal article supplement (doi:10.1039/d3md00447c), 2023-10-16
Supplement: d3md00447c1.pdf [file d3md00447c1.pdf]

## **Discovery of novel $\beta$ -elemene hybrids with hydrogen sulfide releasing moiety possessing cardiovascular protective activity for the treatment of atherosclerosis**

Wenjian Zhu,<sup>‡a</sup> Hongyu Wu,<sup>‡a</sup> Chen He,<sup>a</sup> Huajian Zhu,<sup>a</sup> Hong Yao,<sup>a</sup> Yun Cao,<sup>b</sup> Yueman Shi,<sup>c</sup> Xiaotong Chen,<sup>c</sup> Xue Feng,<sup>c</sup> Shengtao Xu,<sup>\*a</sup> Zheyang Zhu<sup>d</sup> and Jinyi Xu<sup>\*a</sup>

<sup>a</sup> State Key Laboratory of Natural Medicines and Department of Medicinal Chemistry, China Pharmaceutical University, 24 Tong Jia Xiang, Nanjing 210009, PR China

<sup>b</sup> Jinling High School, Nanjing, Jiangsu, 210005, China

<sup>c</sup> 50 Dongbei Street Development Zone, CSPC Yuanda (Dalian) Pharmaceutical CO., LTD, Dalian, Liaoning, 116600, China

<sup>d</sup> Division of Molecular Therapeutics & Formulation, School of Pharmacy, The University of Nottingham, University Park Campus, Nottingham NG7 2RD, UK

\* Corresponding authors e-mail address: jinyixu@china.com (Jinyi Xu); cpuxst@cpu.edu.cn (Shengtao Xu).

<sup>‡</sup> These authors contributed equally to this work

## Table of Contents

|                                                                                   |           |
|-----------------------------------------------------------------------------------|-----------|
| <b><sup>1</sup>H NMR and <sup>13</sup>C NMR Spectrum of Target Compounds.....</b> | <b>S3</b> |
| <sup>1</sup> H NMR and <sup>13</sup> C NMR of compound <b>L13-1a</b> .....        | S3        |
| <sup>1</sup> H NMR and <sup>13</sup> C NMR of compound <b>L13-1b</b> .....        | S4        |
| <sup>1</sup> H NMR and <sup>13</sup> C NMR of compound <b>L13-2a</b> .....        | S5        |
| <sup>1</sup> H NMR and <sup>13</sup> C NMR of compound <b>L13-2b</b> .....        | S6        |
| <sup>1</sup> H NMR and <sup>13</sup> C NMR of compound <b>L13-2c</b> .....        | S7        |
| <sup>1</sup> H NMR and <sup>13</sup> C NMR of compound <b>L13-2d</b> .....        | S8        |
| <sup>1</sup> H NMR and <sup>13</sup> C NMR of compound <b>L13-2e</b> .....        | S9        |
| <sup>1</sup> H NMR and <sup>13</sup> C NMR of compound <b>L13-2f</b> .....        | S10       |
| <sup>1</sup> H NMR and <sup>13</sup> C NMR of compound <b>L13-2g</b> .....        | S11       |
| <sup>1</sup> H NMR and <sup>13</sup> C NMR of compound <b>L13-2h</b> .....        | S12       |
| <sup>1</sup> H NMR and <sup>13</sup> C NMR of compound <b>L13-3a</b> .....        | S13       |
| <sup>1</sup> H NMR and <sup>13</sup> C NMR of compound <b>L13-3b</b> .....        | S14       |
| <sup>1</sup> H NMR and <sup>13</sup> C NMR of compound <b>L13-3c</b> .....        | S15       |
| <sup>1</sup> H NMR and <sup>13</sup> C NMR of compound <b>L13-3d</b> .....        | S16       |
| <sup>1</sup> H NMR and <sup>13</sup> C NMR of compound <b>L13-4a</b> .....        | S17       |
| <sup>1</sup> H NMR and <sup>13</sup> C NMR of compound <b>L13-4b</b> .....        | S18       |
| <sup>1</sup> H NMR and <sup>13</sup> C NMR of compound <b>L14-2a</b> .....        | S19       |
| <sup>1</sup> H NMR and <sup>13</sup> C NMR of compound <b>L14-2b</b> .....        | S20       |
| <sup>1</sup> H NMR and <sup>13</sup> C NMR of compound <b>L14-4a</b> .....        | S21       |
| <sup>1</sup> H NMR and <sup>13</sup> C NMR of compound <b>L14-4b</b> .....        | S22       |
| HPLC purity profile of compound <b>L13-2h</b> .....                               | S23       |

# <sup>1</sup>H NMR and <sup>13</sup>C NMR Spectrum of Target Compounds.

## <sup>1</sup>H NMR and <sup>13</sup>C NMR of compound L13-1a

adt-3-hpsg-lxx-20210515, 1.fid  
adt-3-hpsg-lxx 1h cdcl3

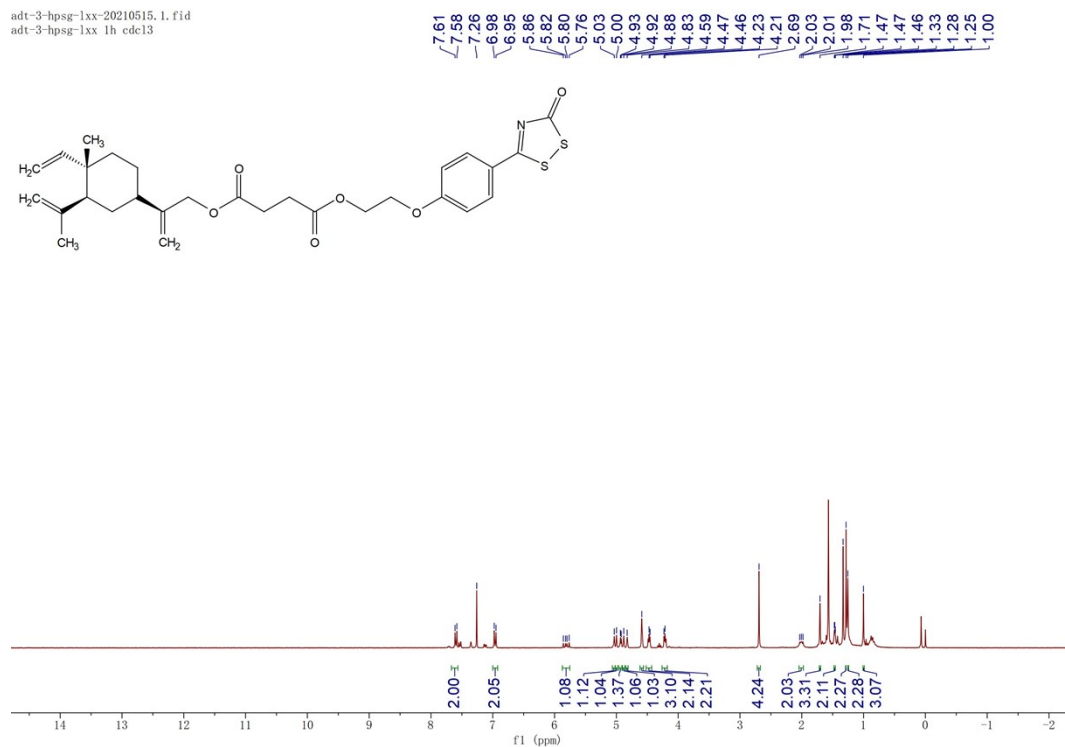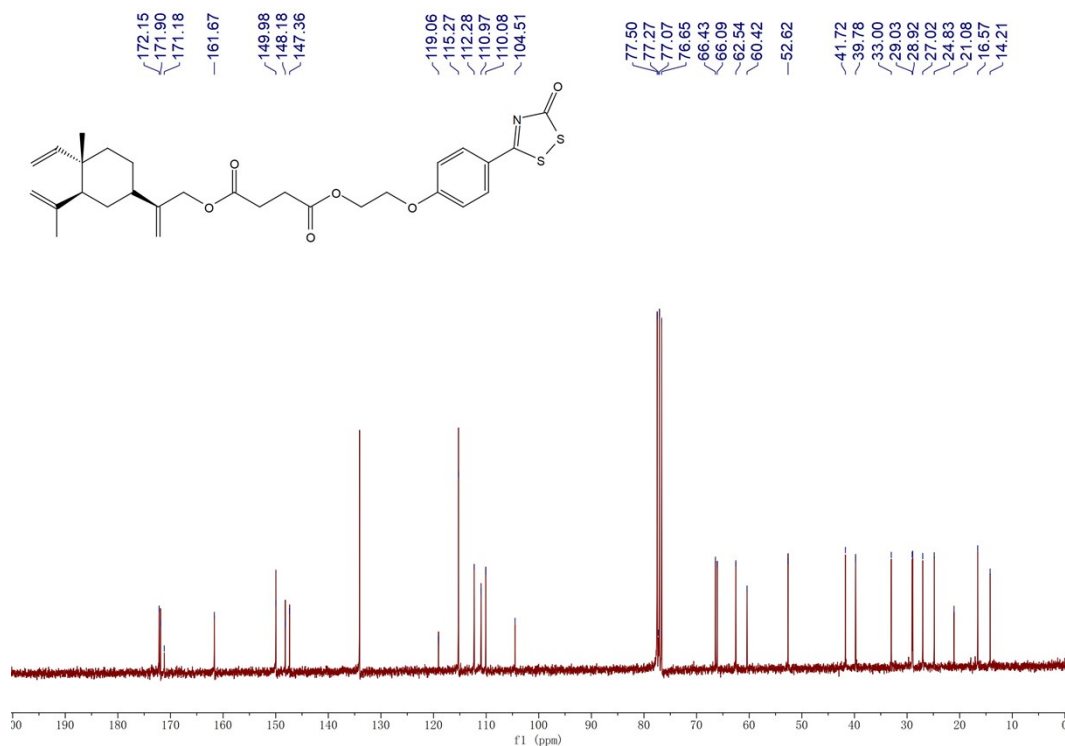

$^1\text{H}$  NMR and  $^{13}\text{C}$  NMR of compound **L13-1b**

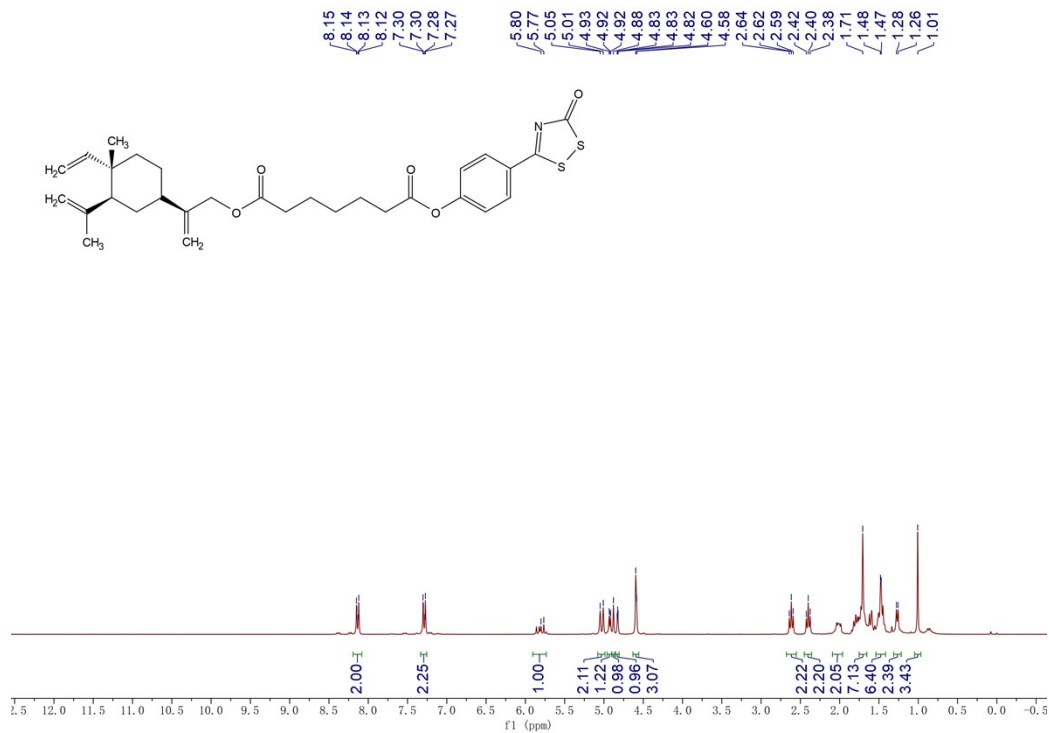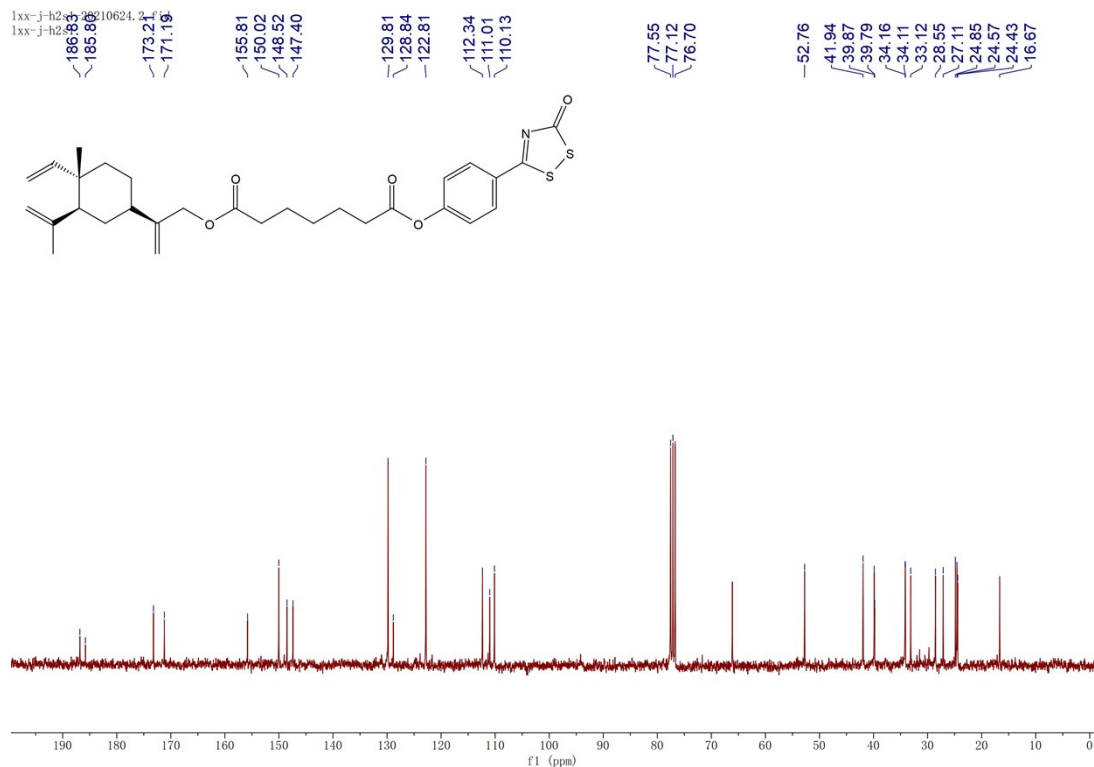

$^1\text{H}$  NMR and  $^{13}\text{C}$  NMR of compound L13-2a

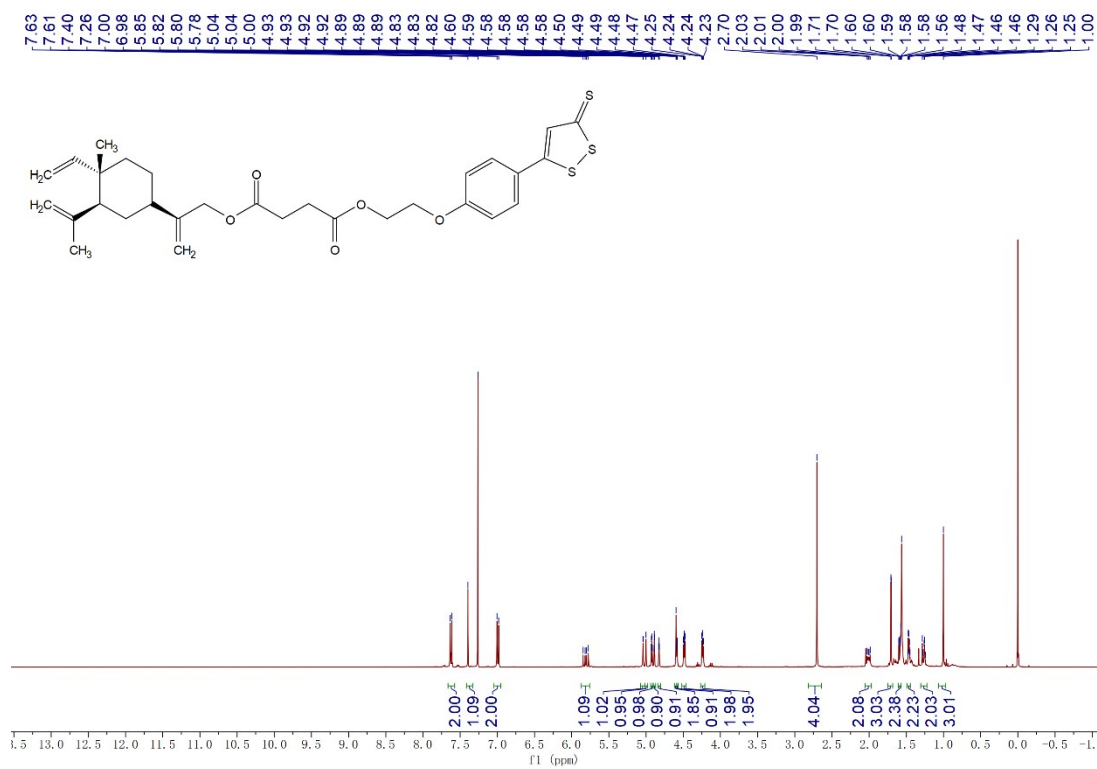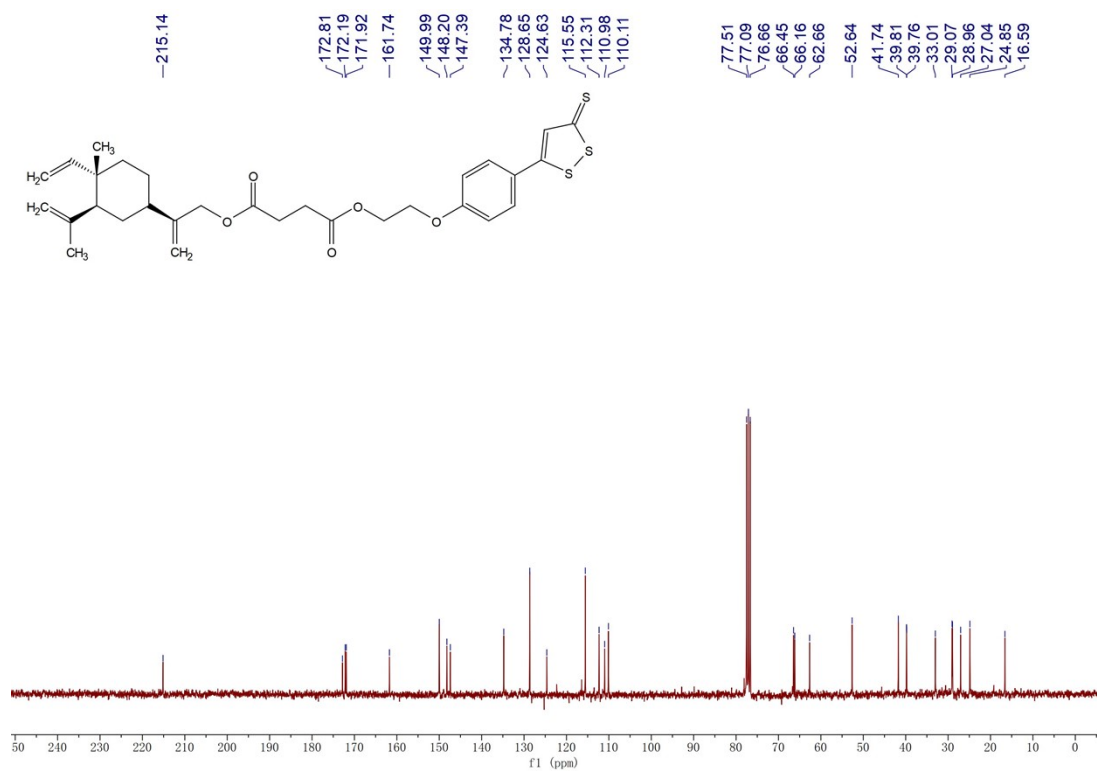

$^1\text{H}$  NMR and  $^{13}\text{C}$  NMR of compound **L13-2b**

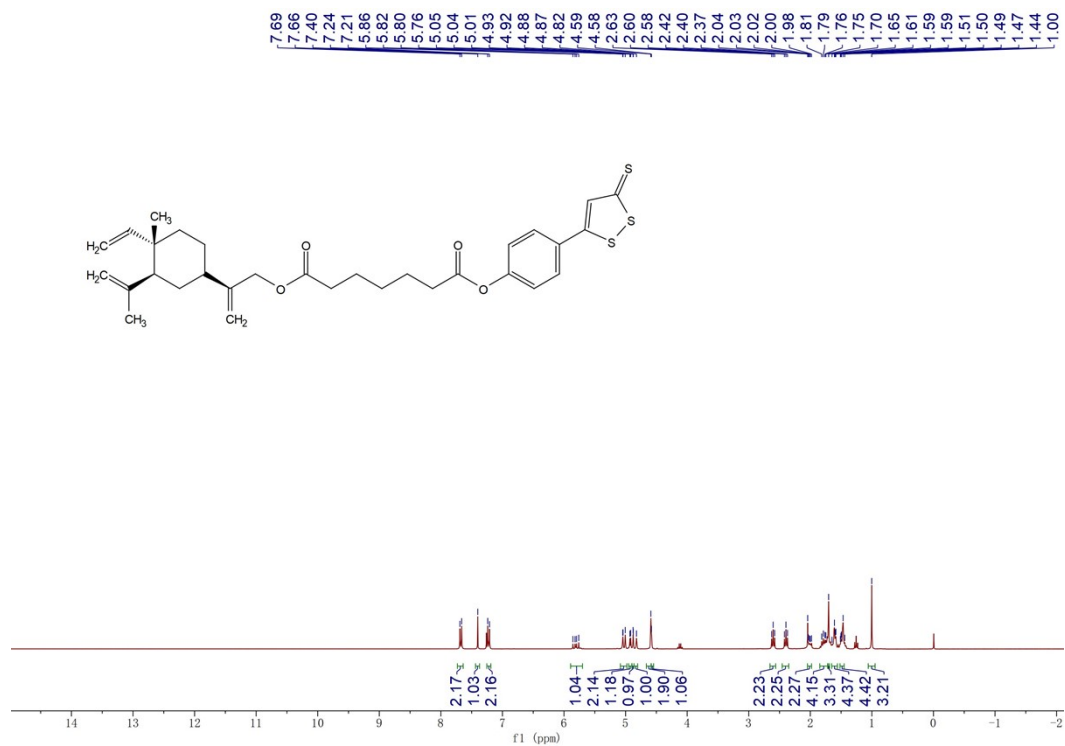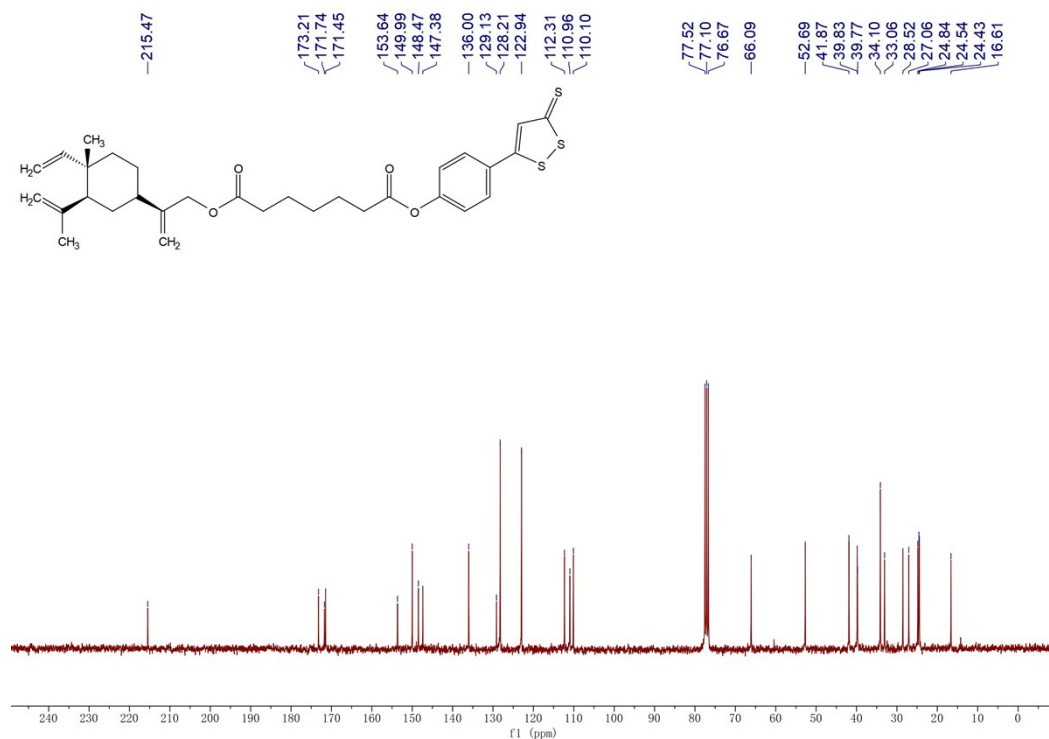

$^1\text{H}$  NMR and  $^{13}\text{C}$  NMR of compound L13-2c

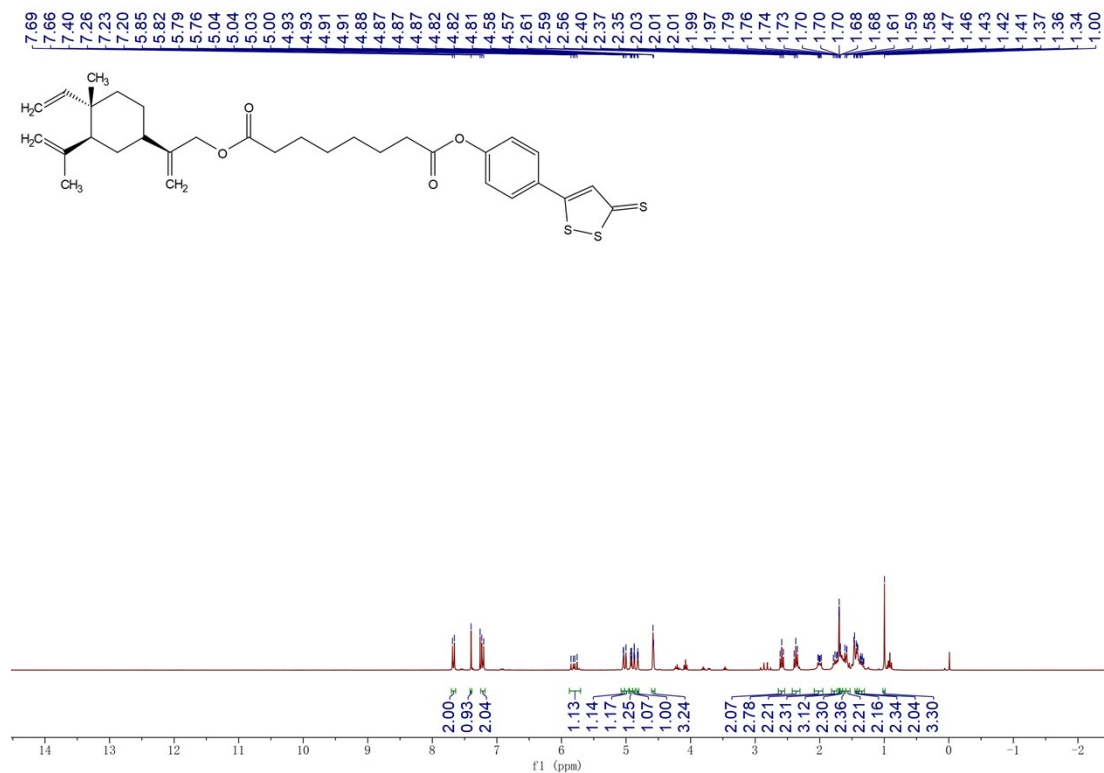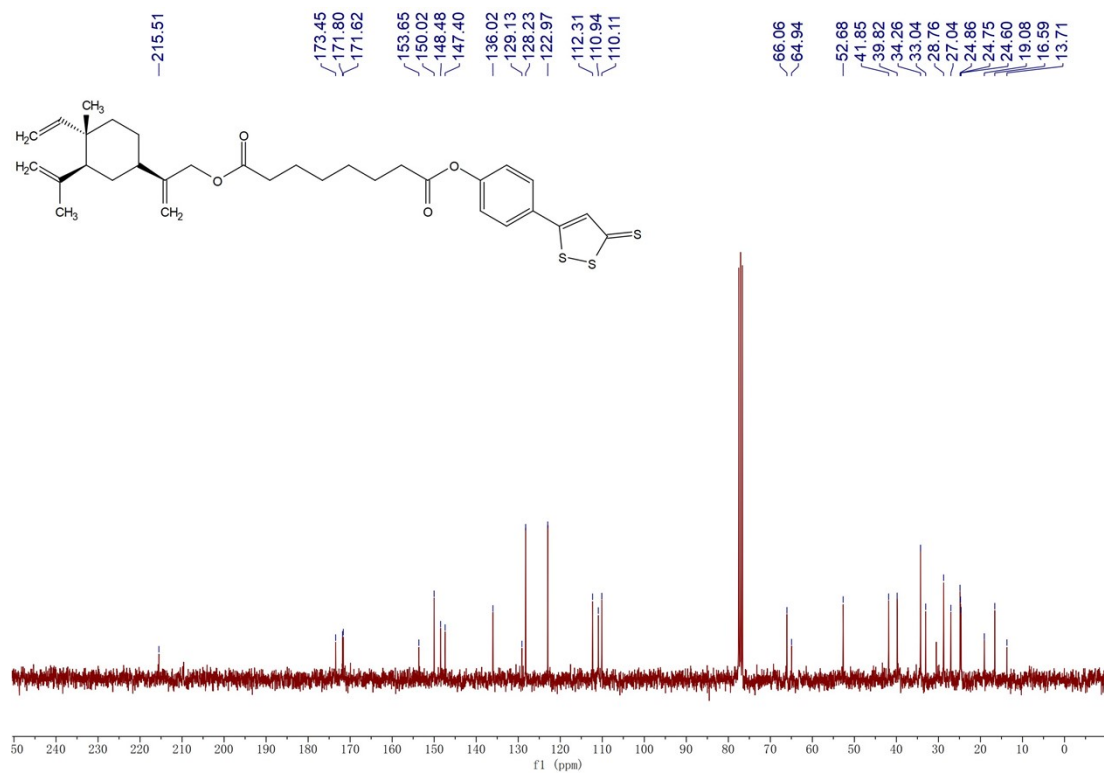

$^1\text{H}$  NMR and  $^{13}\text{C}$  NMR of compound L13-2d

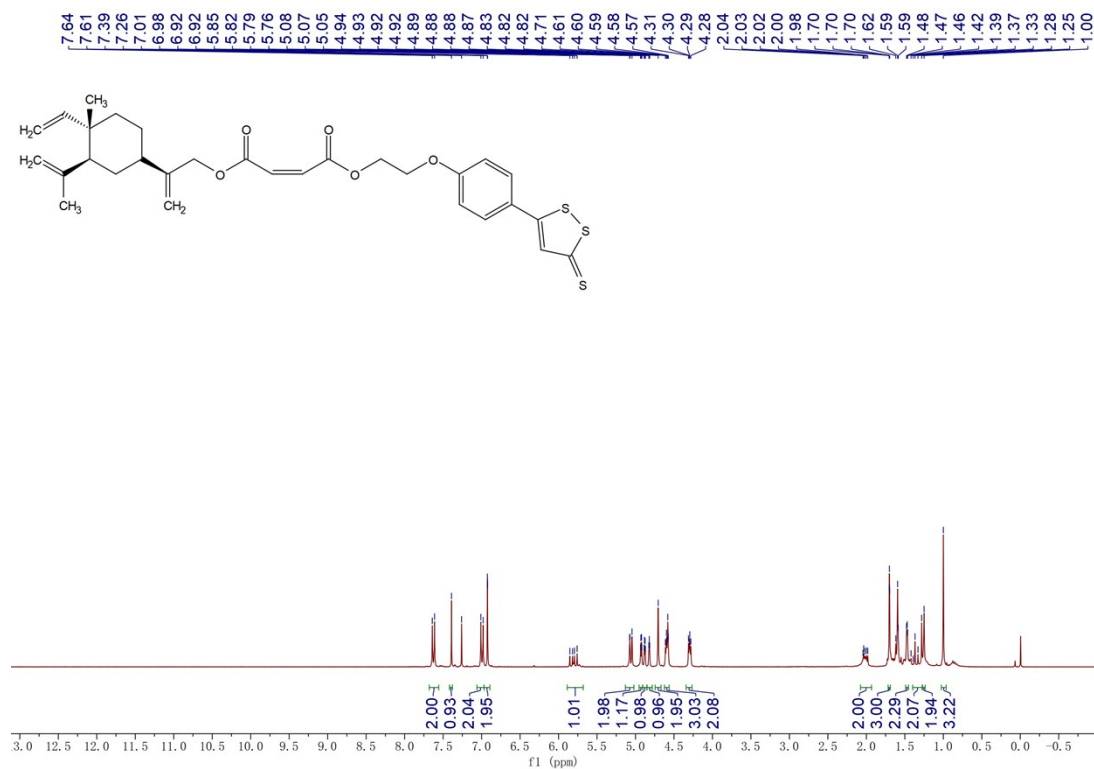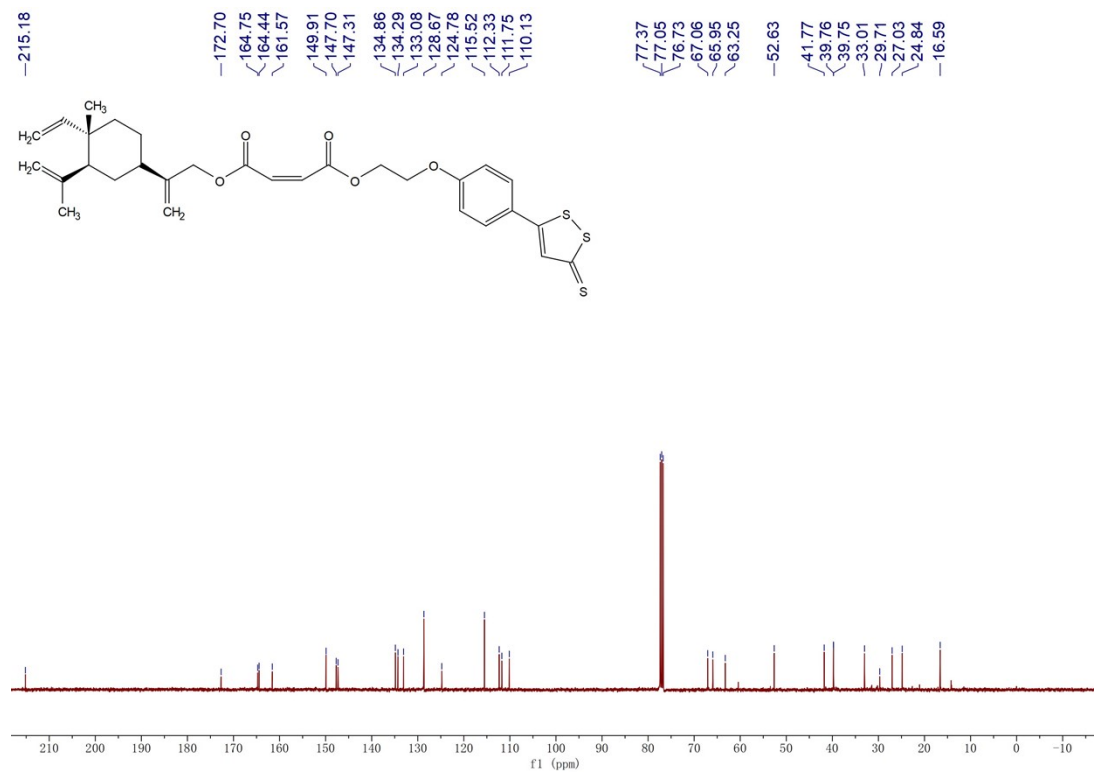



# $^1\text{H}$ NMR and $^{13}\text{C}$ NMR of compound L13-2e

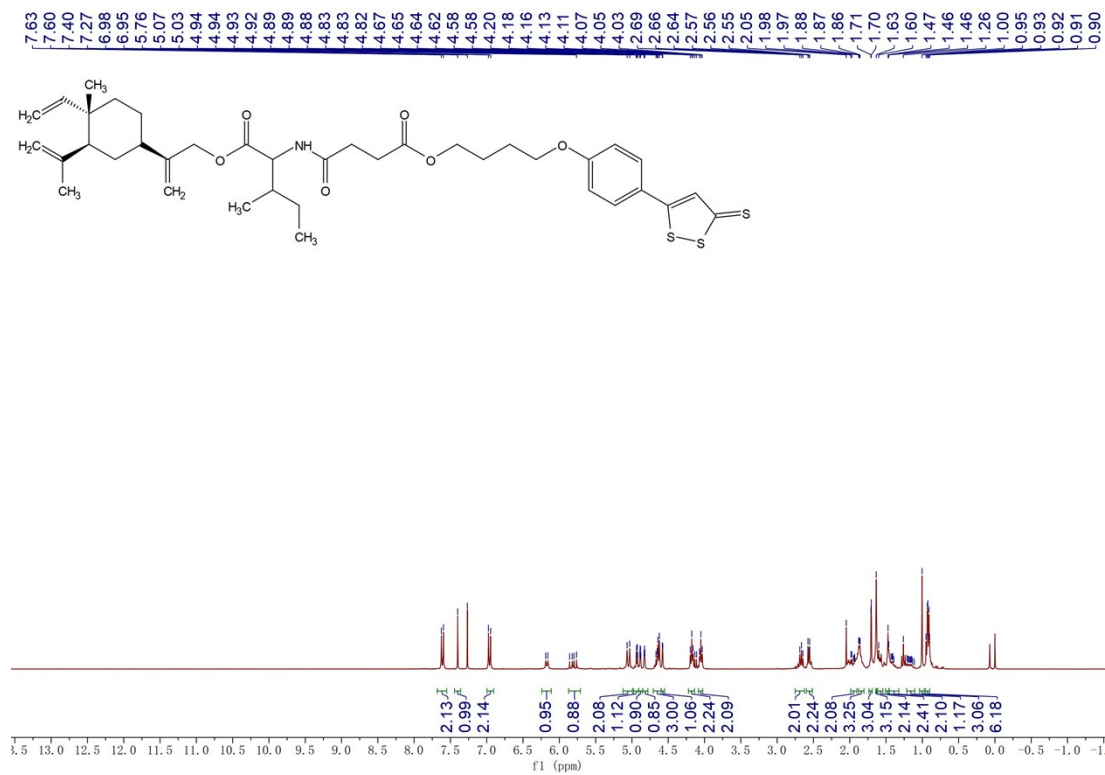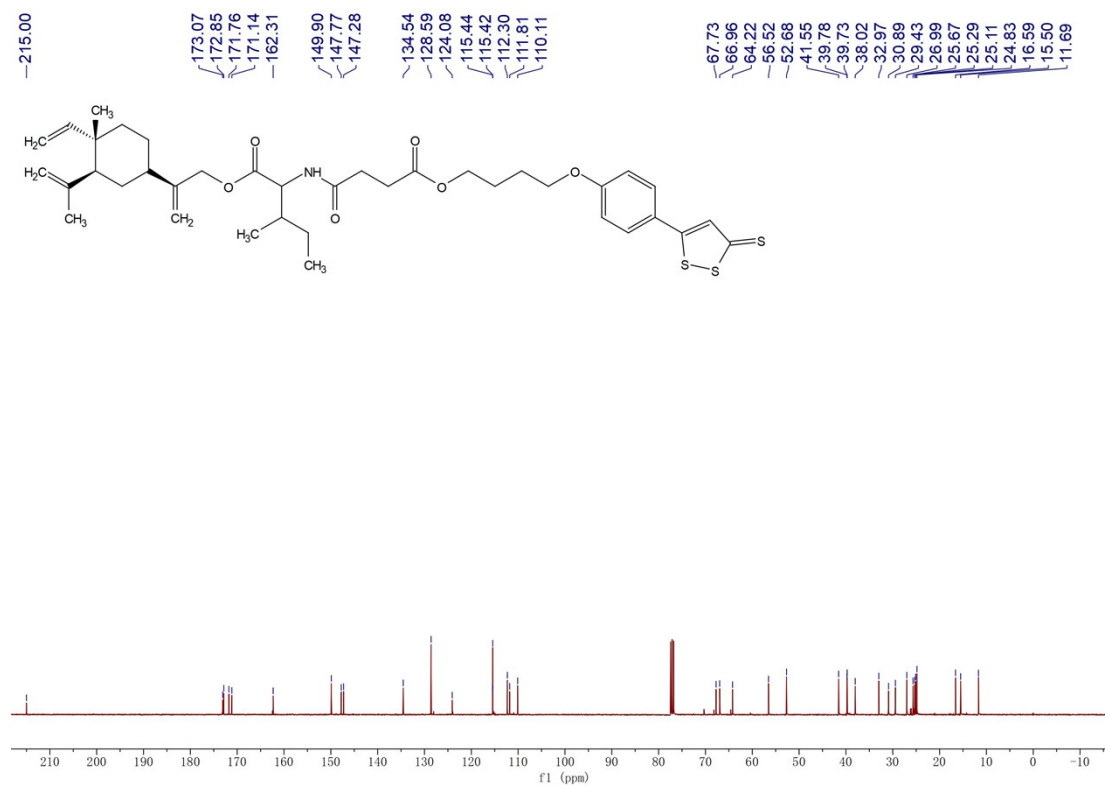

$^1\text{H}$  NMR and  $^{13}\text{C}$  NMR of compound L13-2f

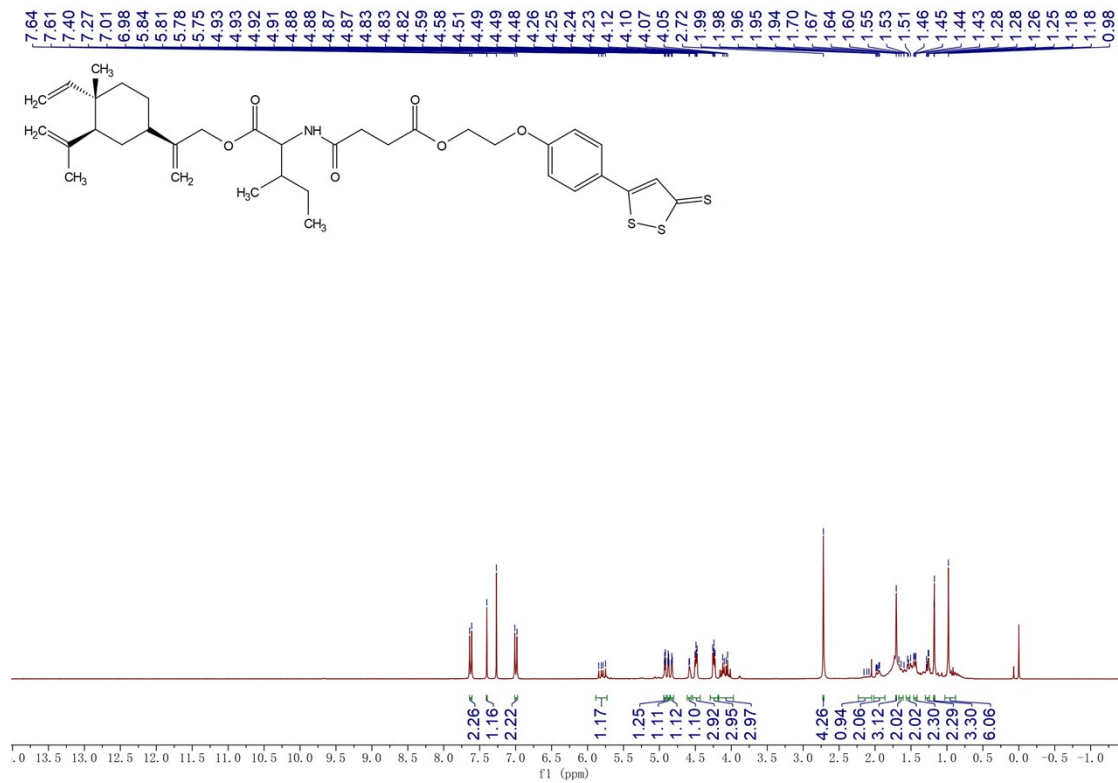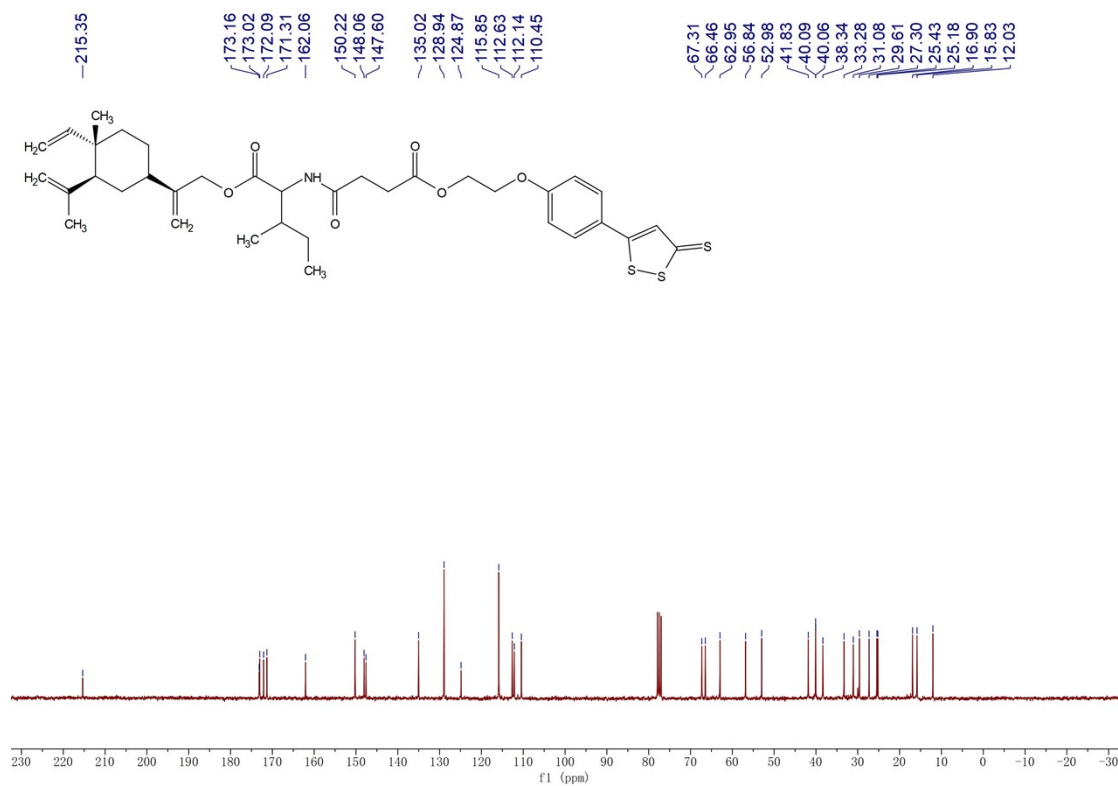

<sup>1</sup>H NMR and <sup>13</sup>C NMR of compound L13-2g

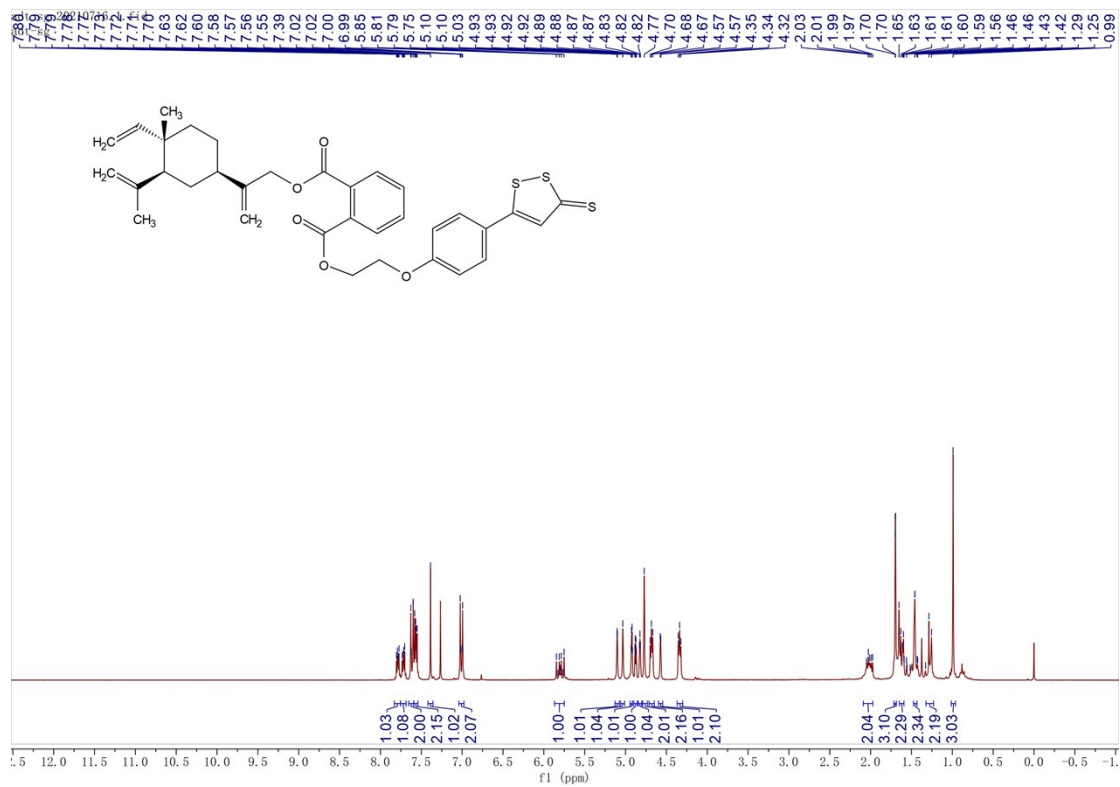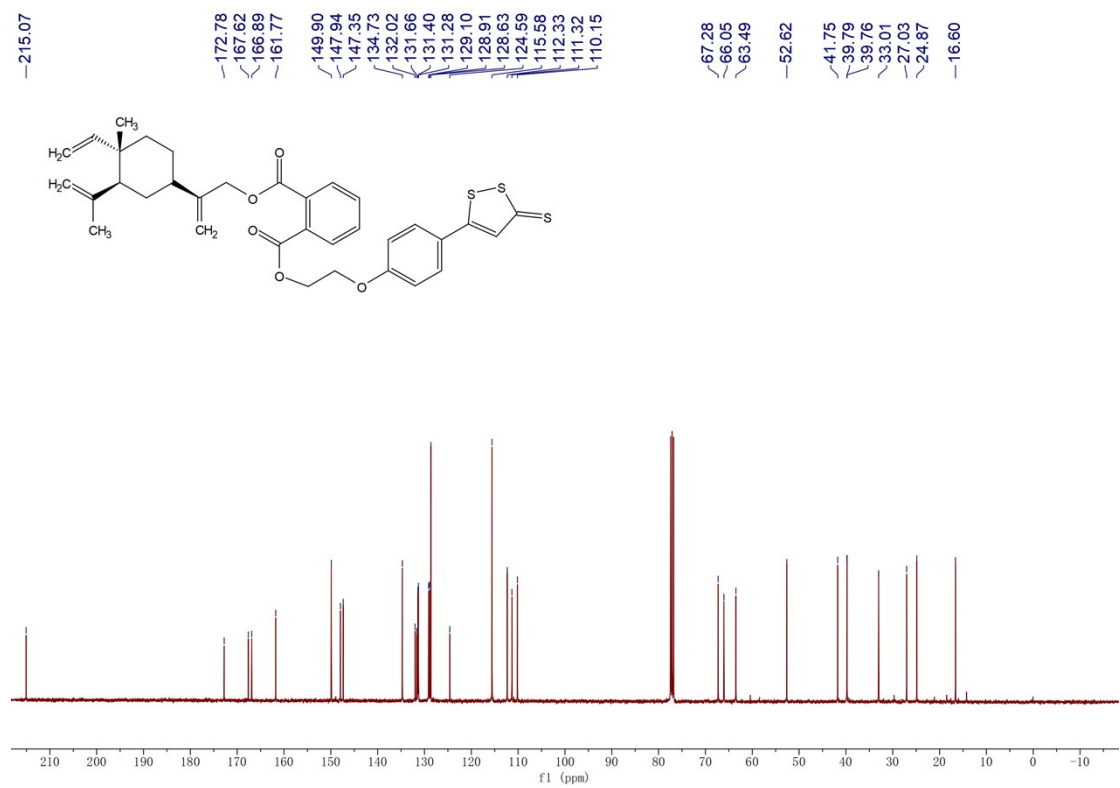

# $^1\text{H}$ NMR and $^{13}\text{C}$ NMR of compound L13-2h

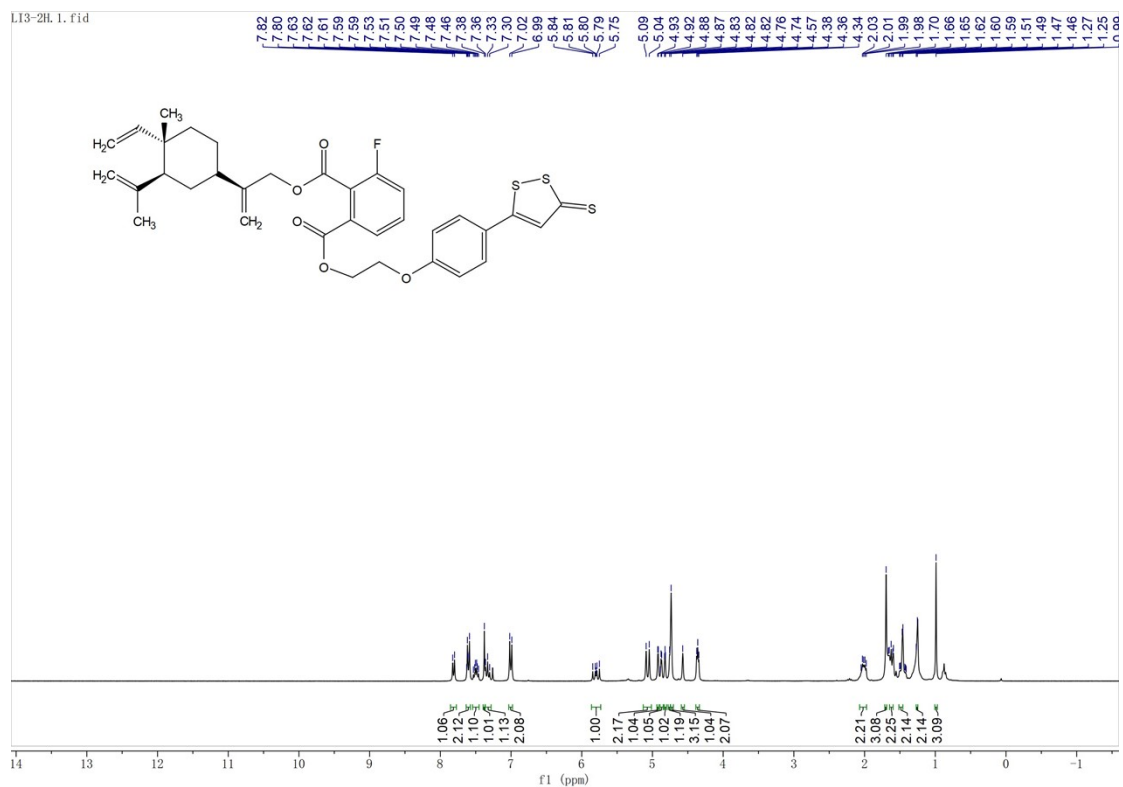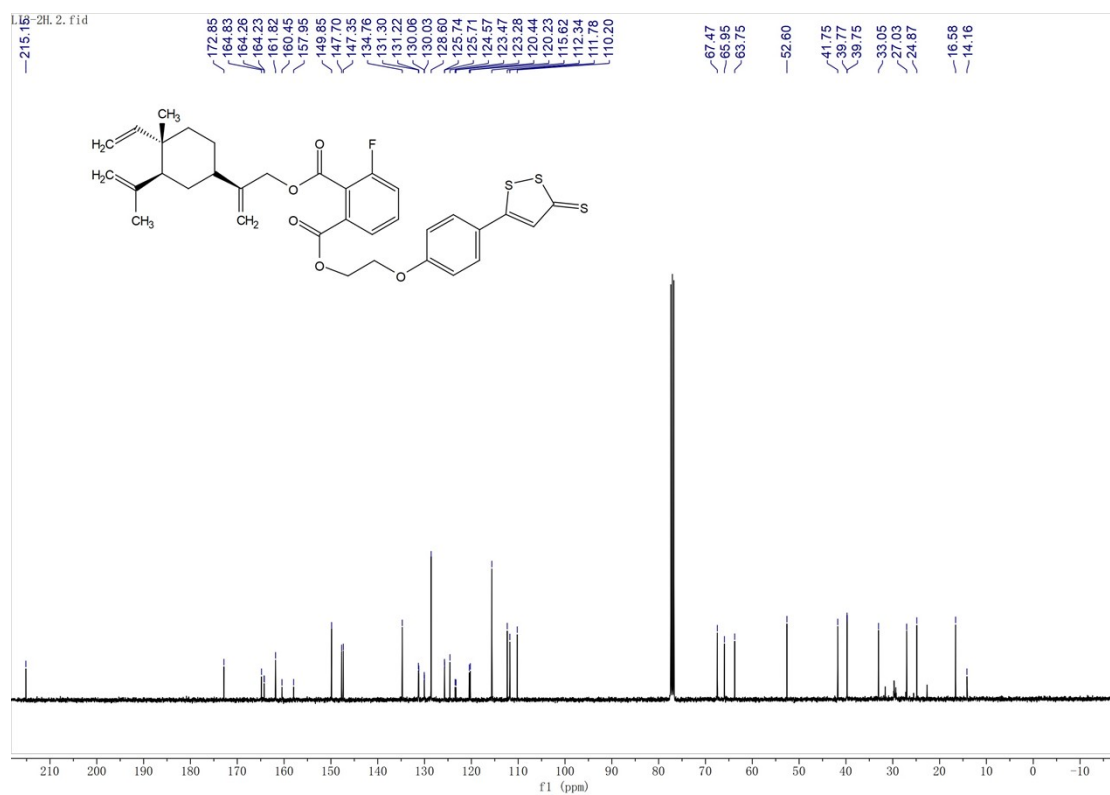

$^1\text{H}$  NMR and  $^{13}\text{C}$  NMR of compound **L13-3a**

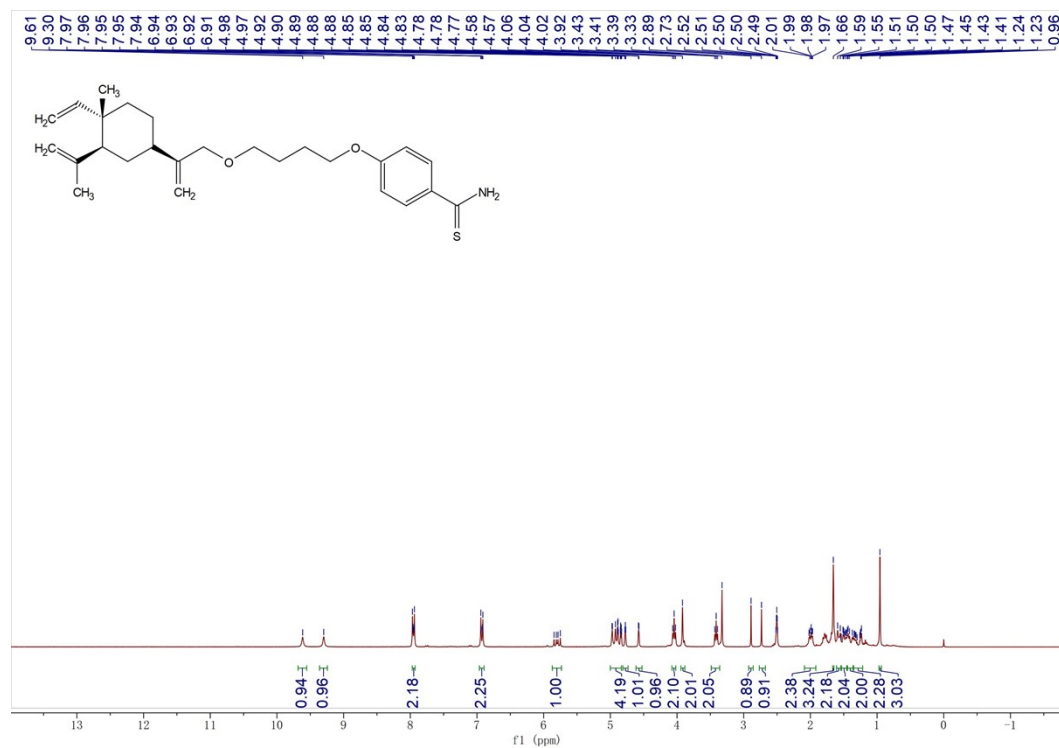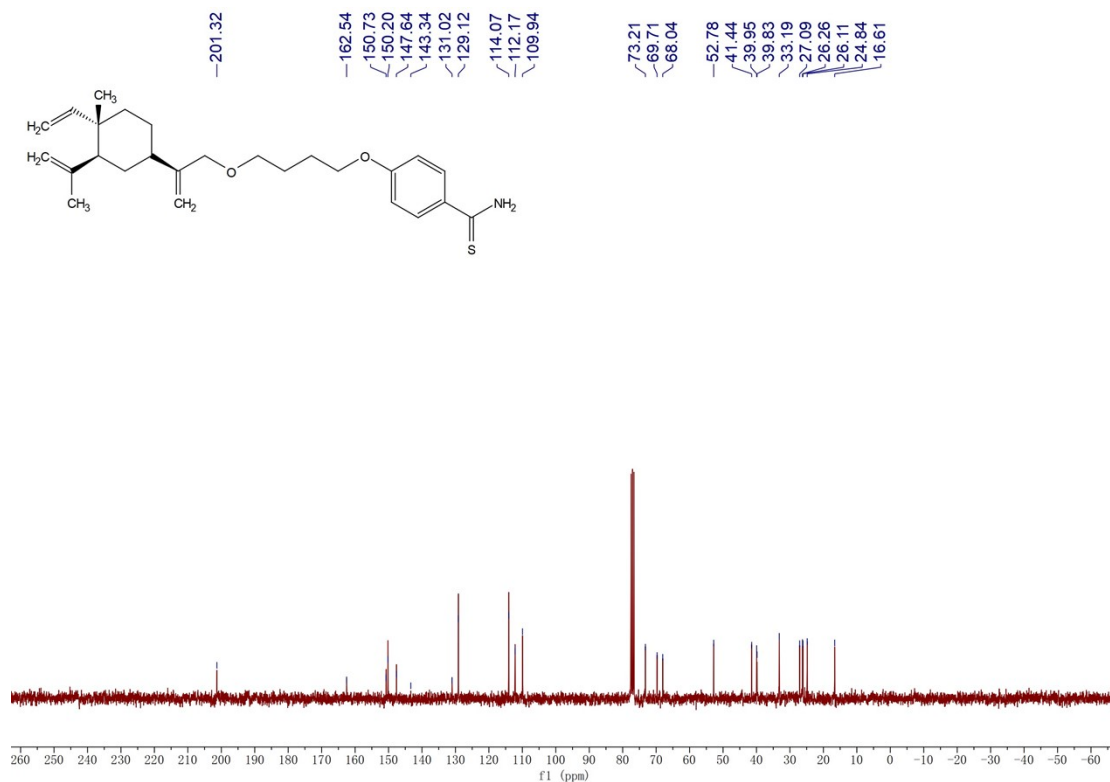

$^1\text{H}$  NMR and  $^{13}\text{C}$  NMR of compound **L13-3b**

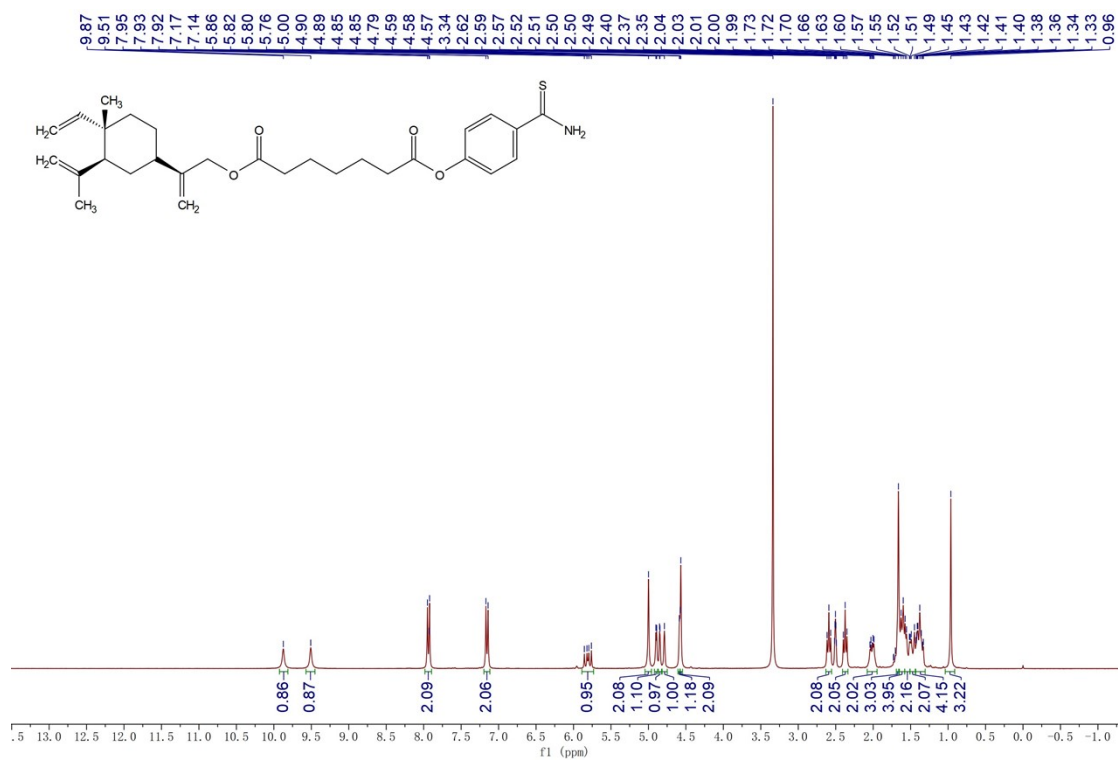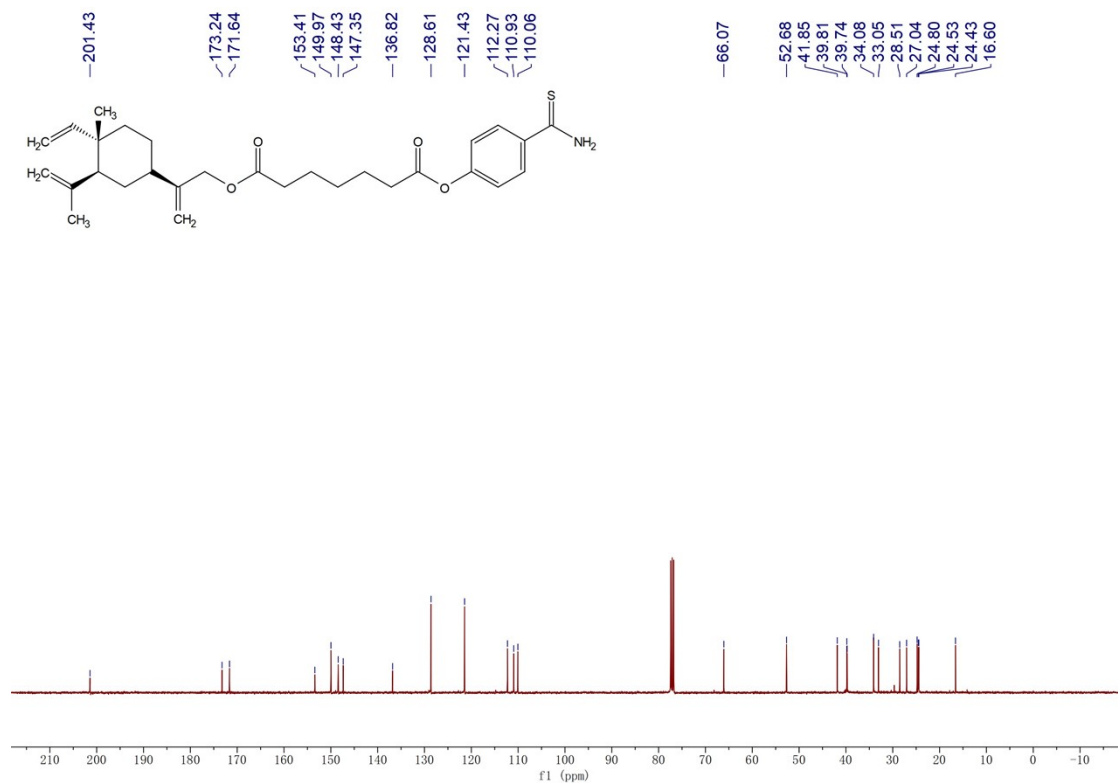

$^1\text{H}$  NMR and  $^{13}\text{C}$  NMR of compound L13-3c

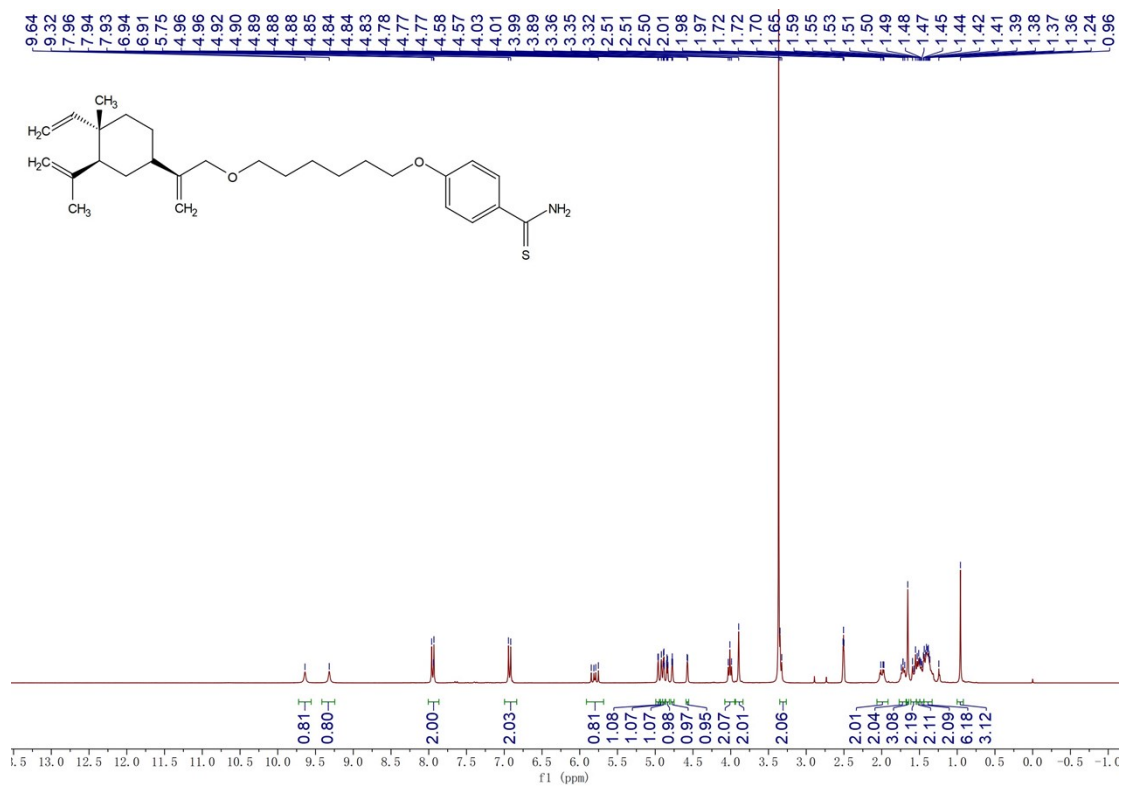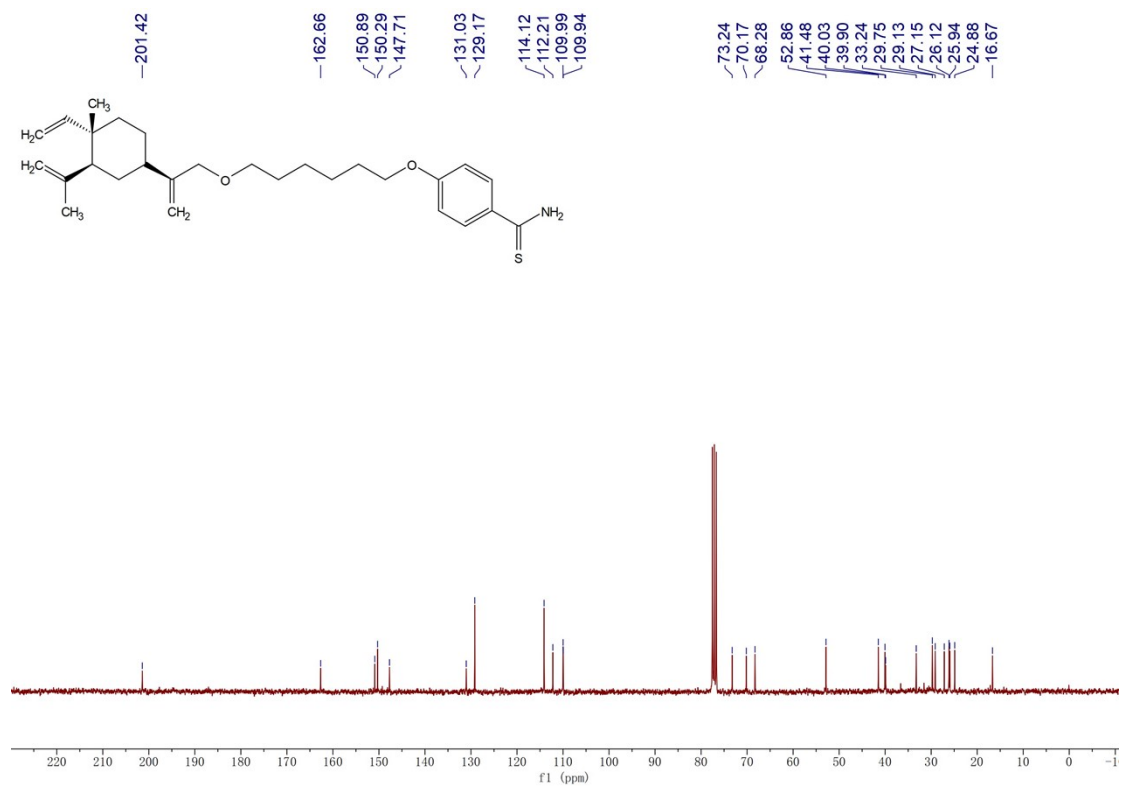

$^1\text{H}$  NMR and  $^{13}\text{C}$  NMR of compound L13-3d

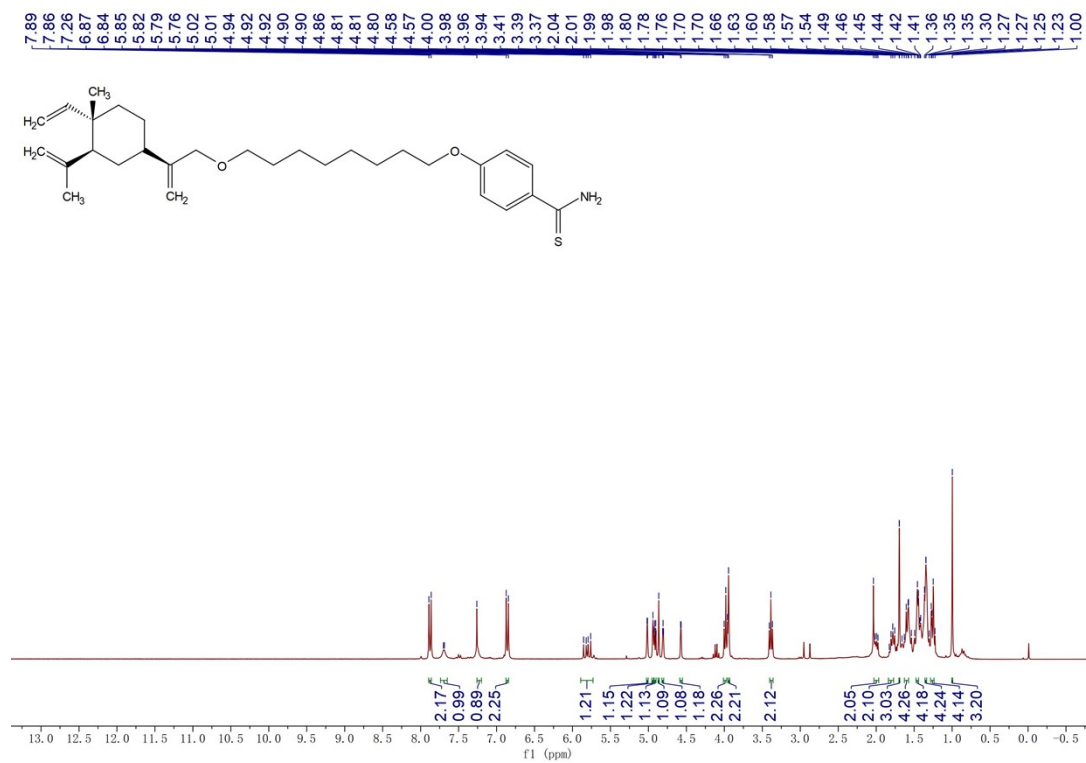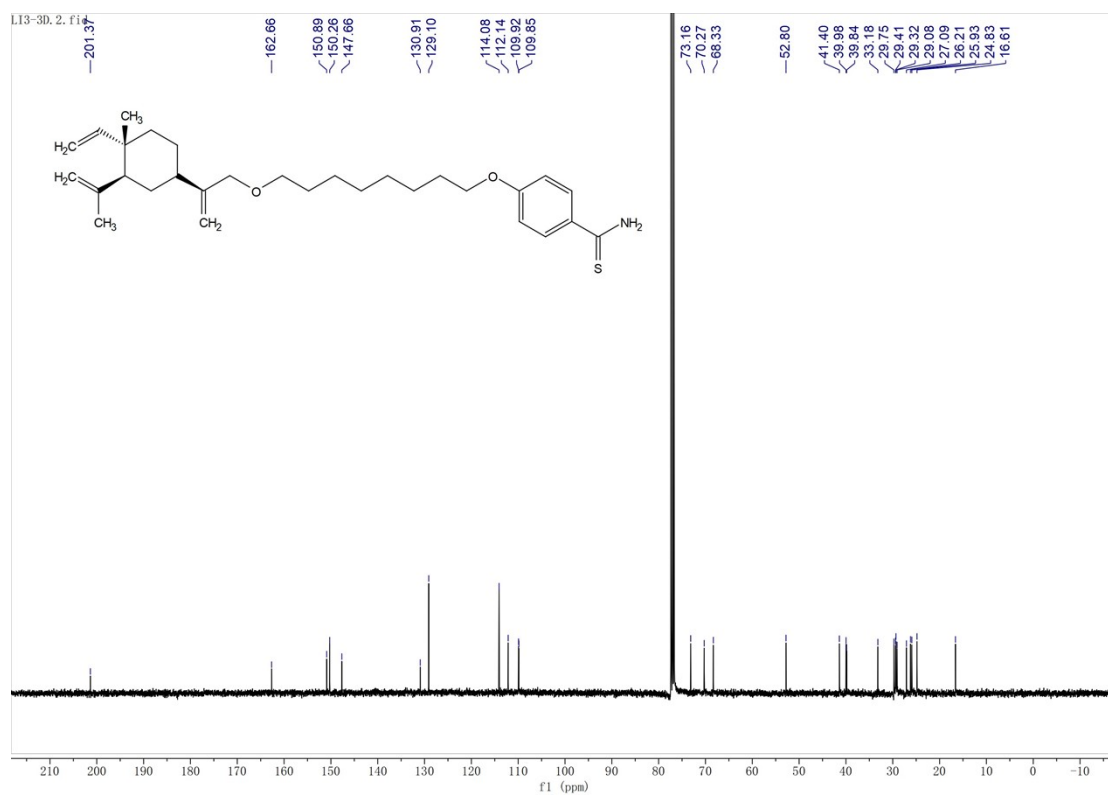



$^1\text{H}$  NMR and  $^{13}\text{C}$  NMR of compound **L13-4a**

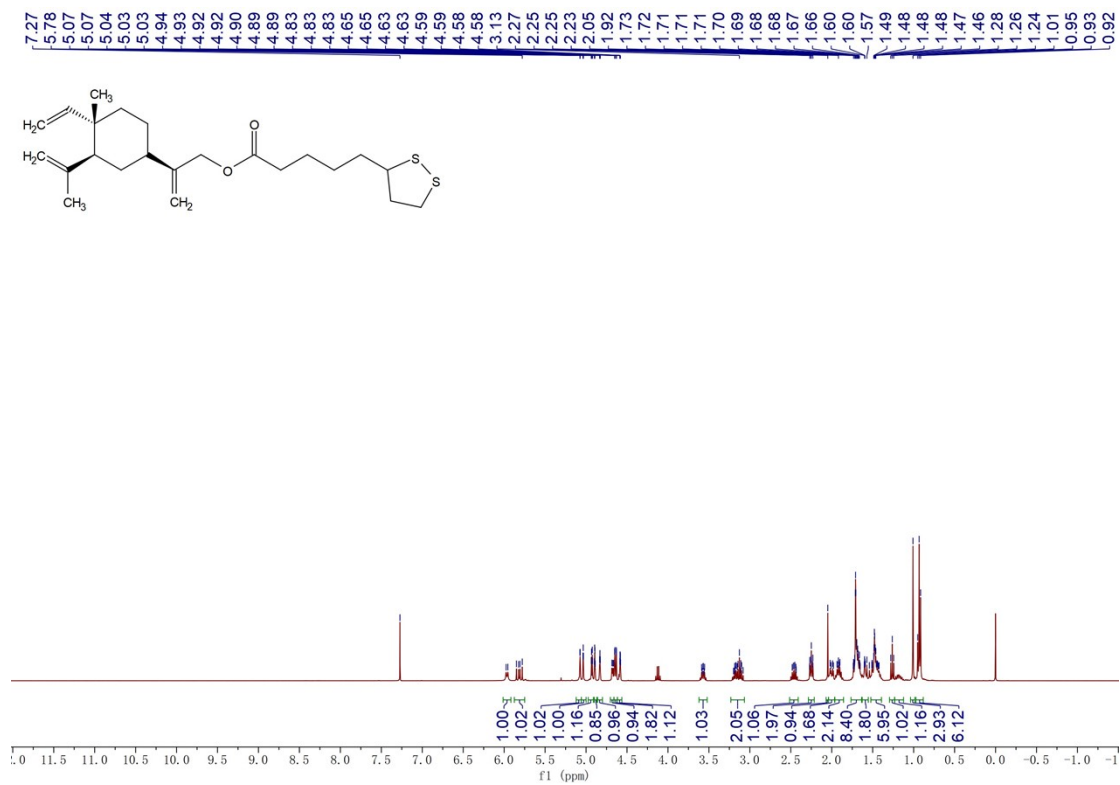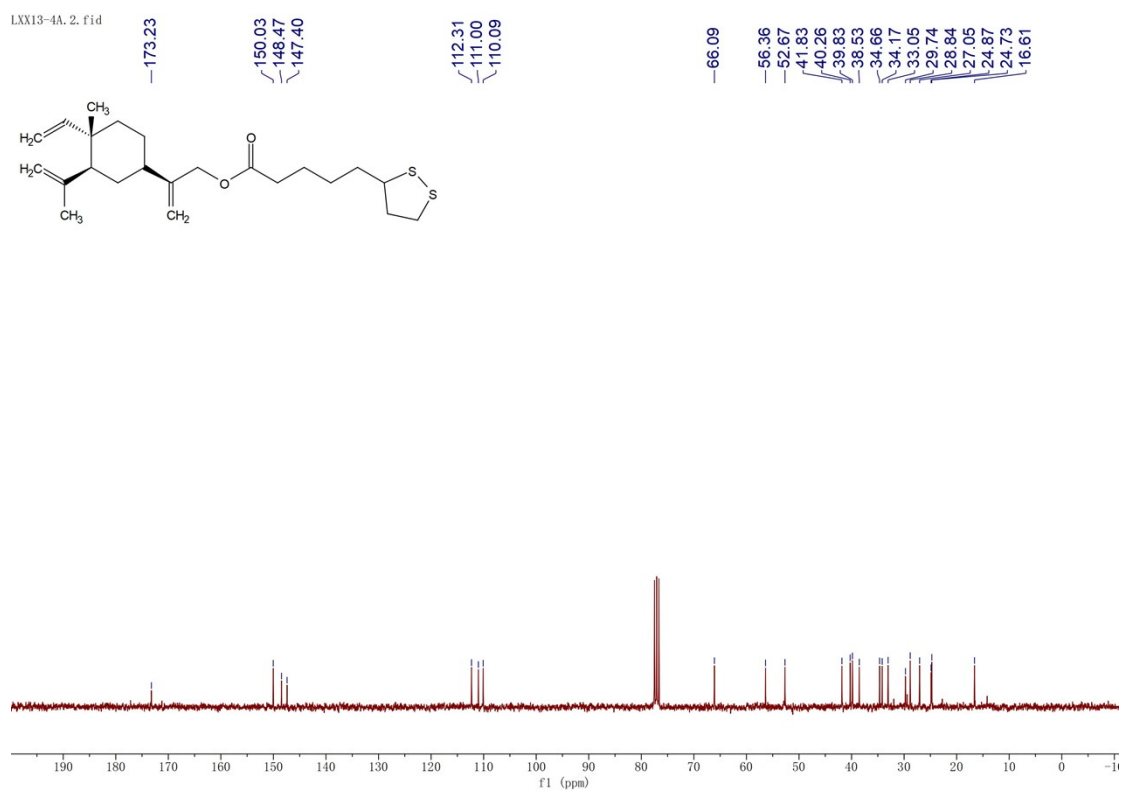

$^1\text{H}$  NMR and  $^{13}\text{C}$  NMR of compound L13-4b

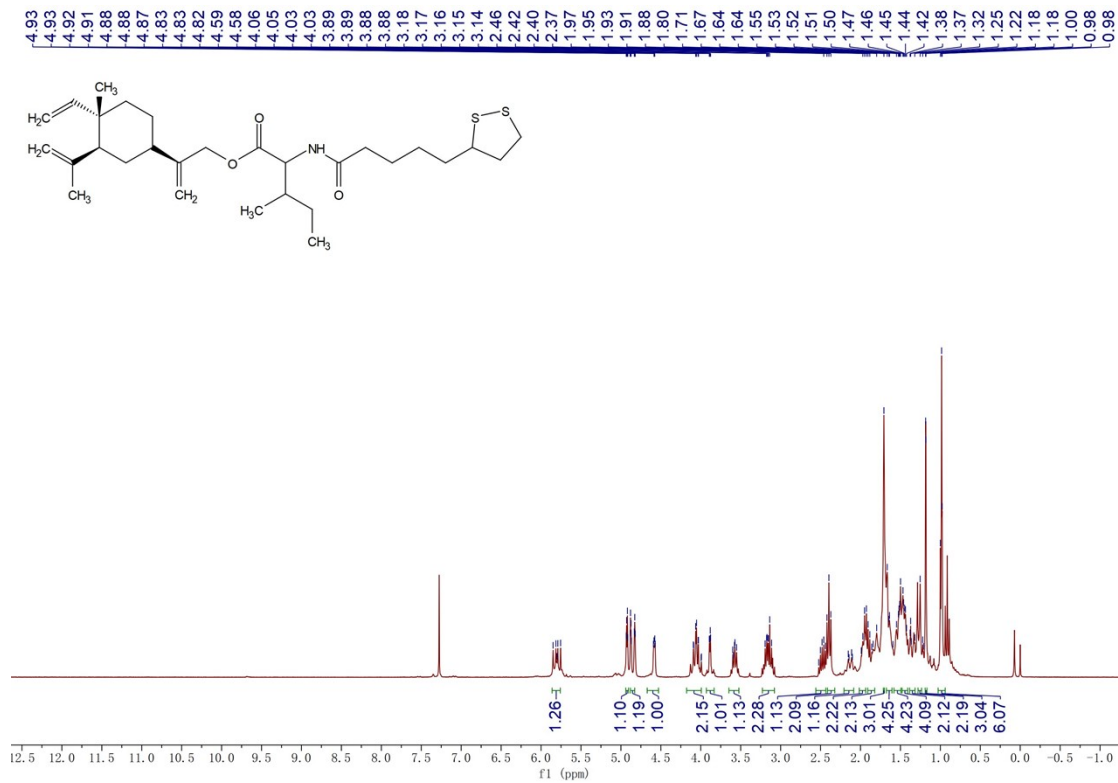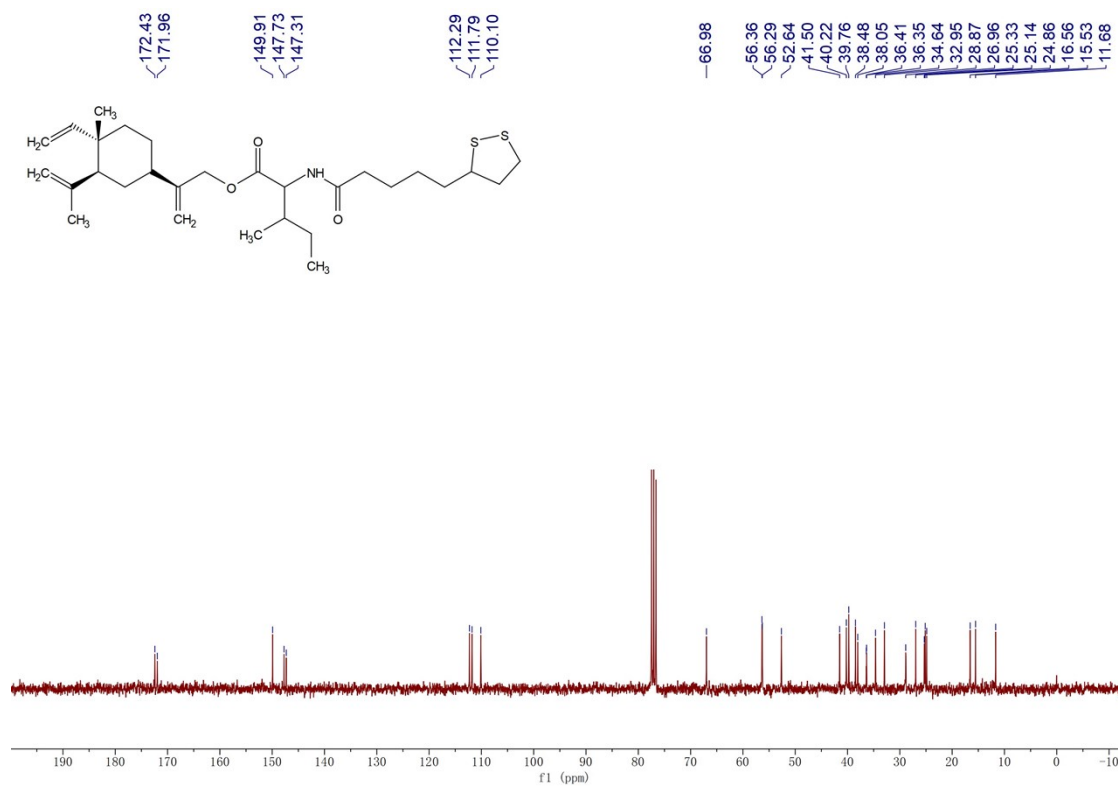

$^1\text{H}$  NMR and  $^{13}\text{C}$  NMR of compound **L14-2a**

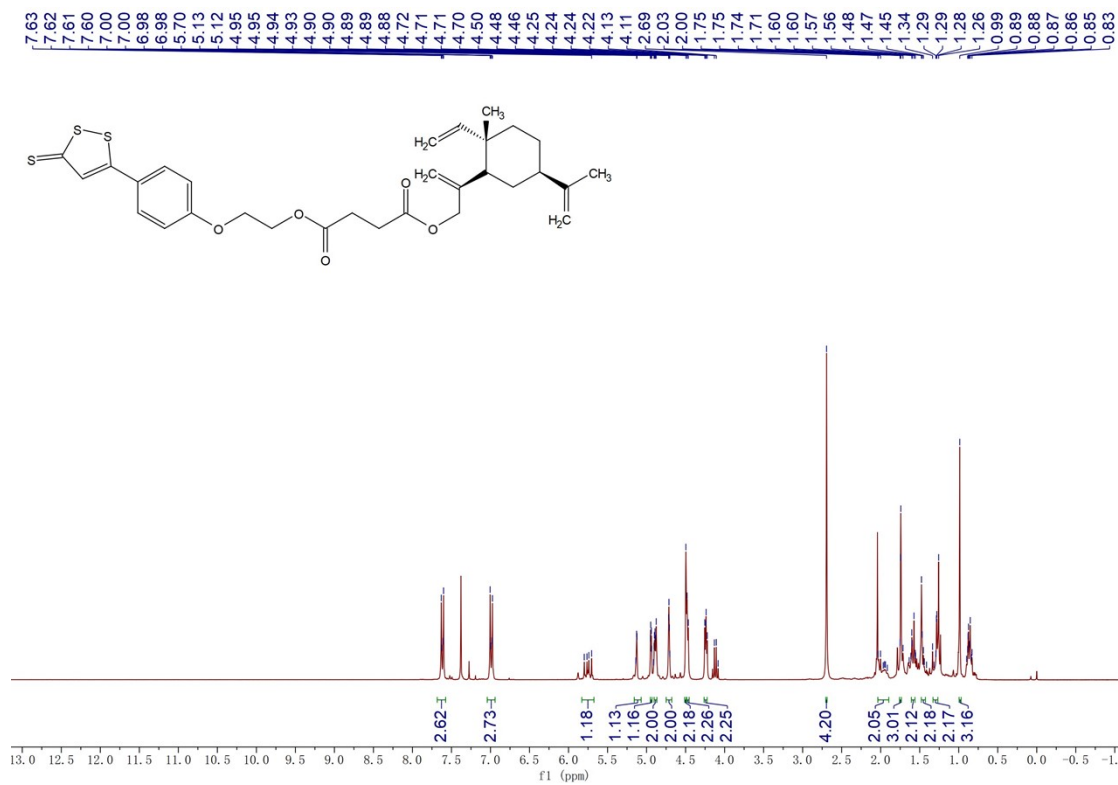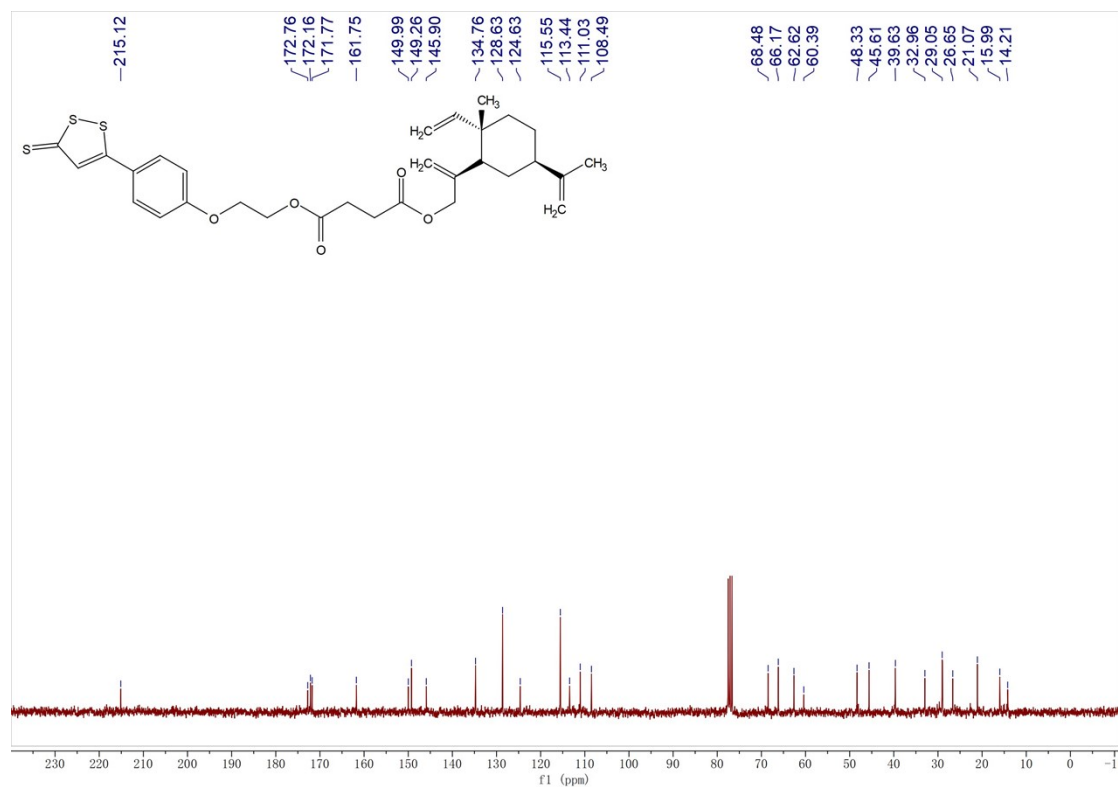

$^1\text{H}$  NMR and  $^{13}\text{C}$  NMR of compound L14-2b

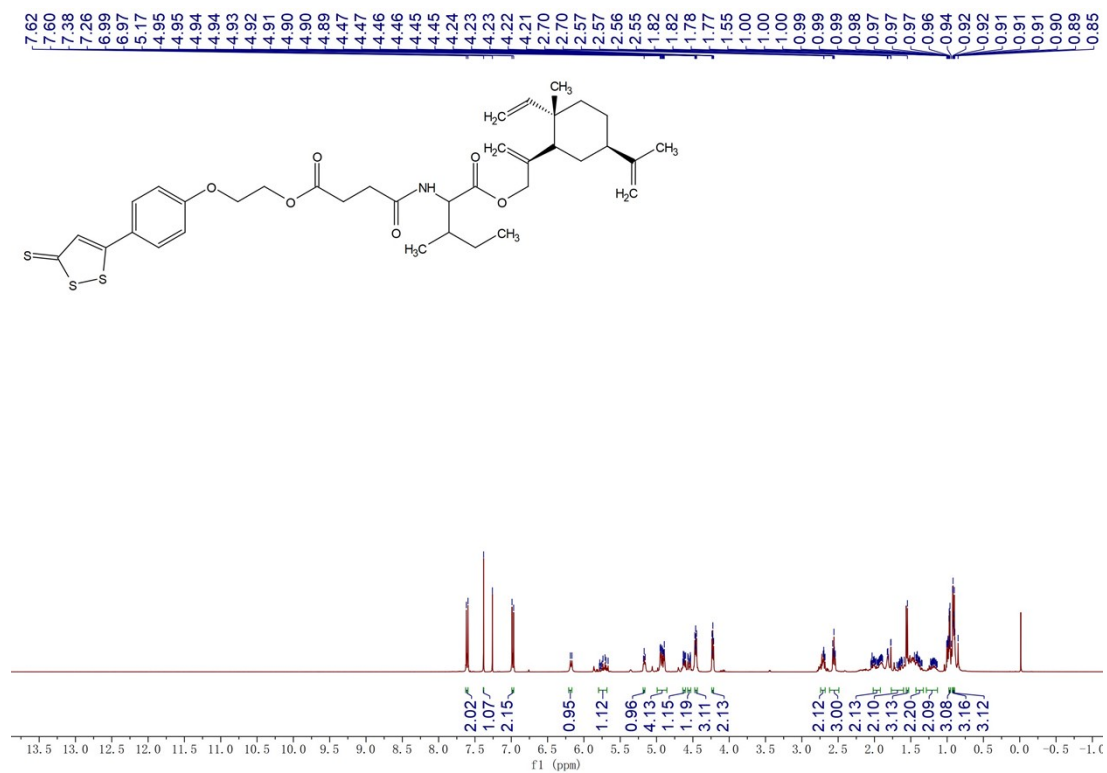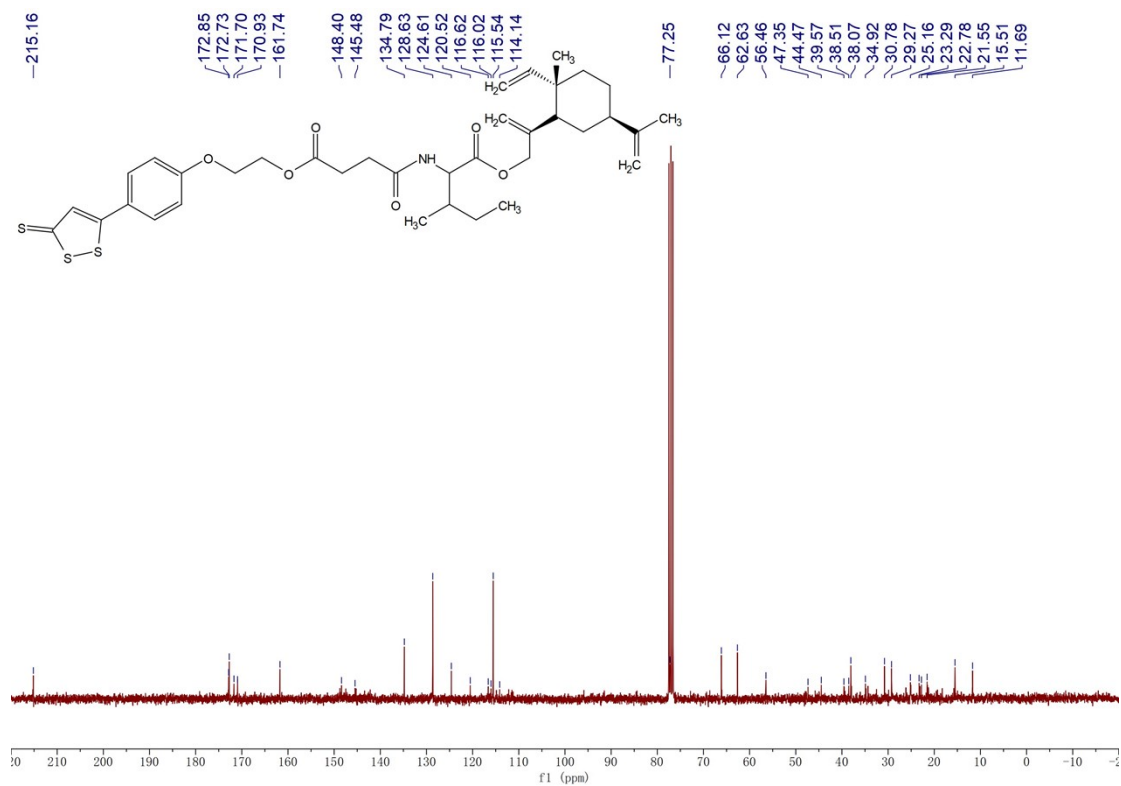

$^1\text{H}$  NMR and  $^{13}\text{C}$  NMR of compound **L14-4a**

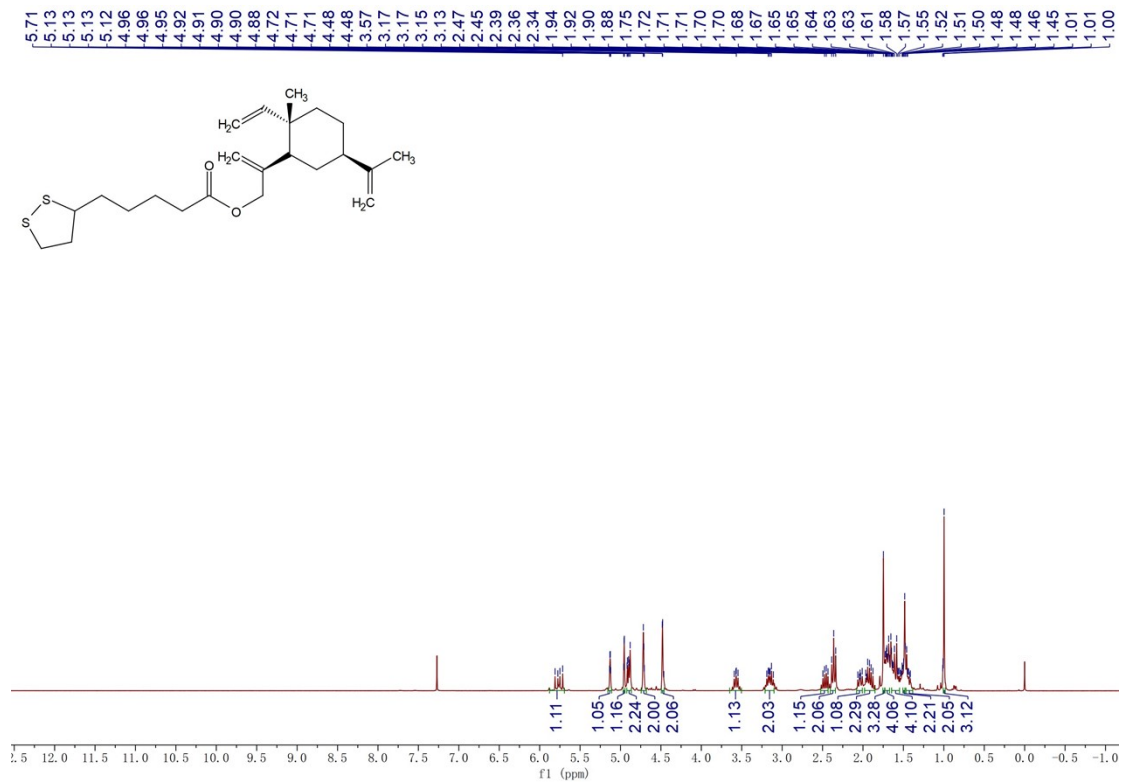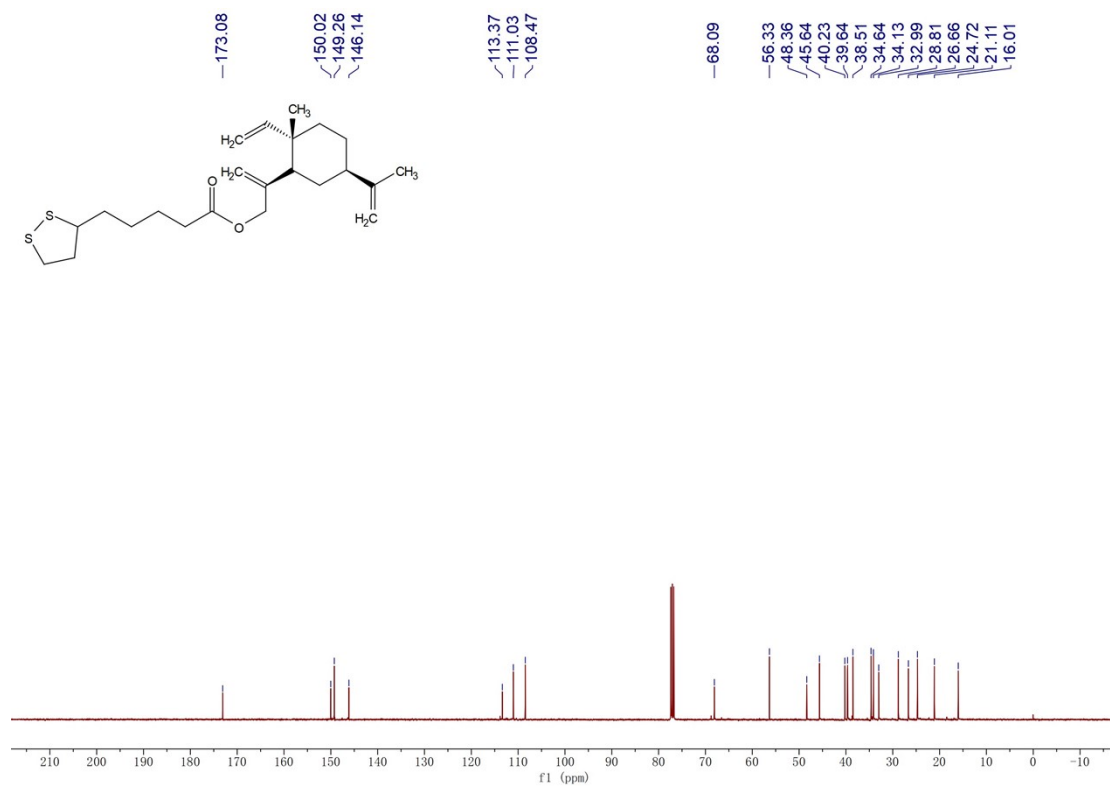

$^1\text{H}$  NMR and  $^{13}\text{C}$  NMR of compound L14-4b

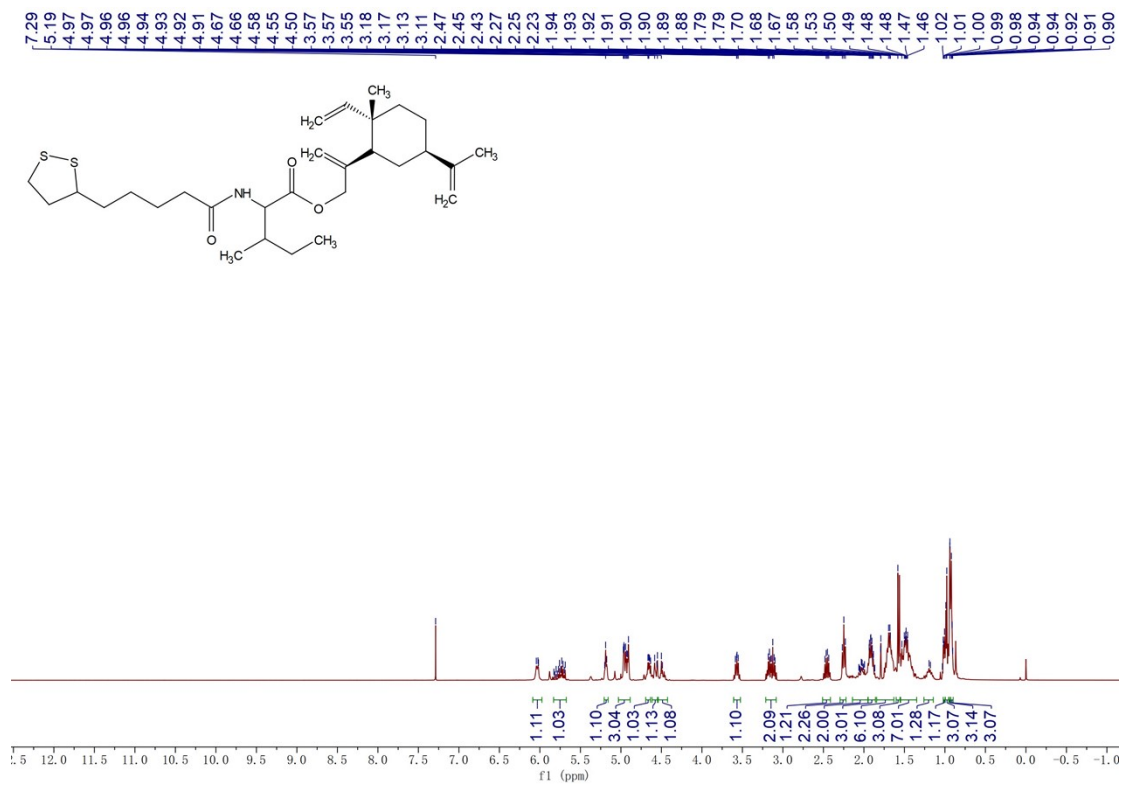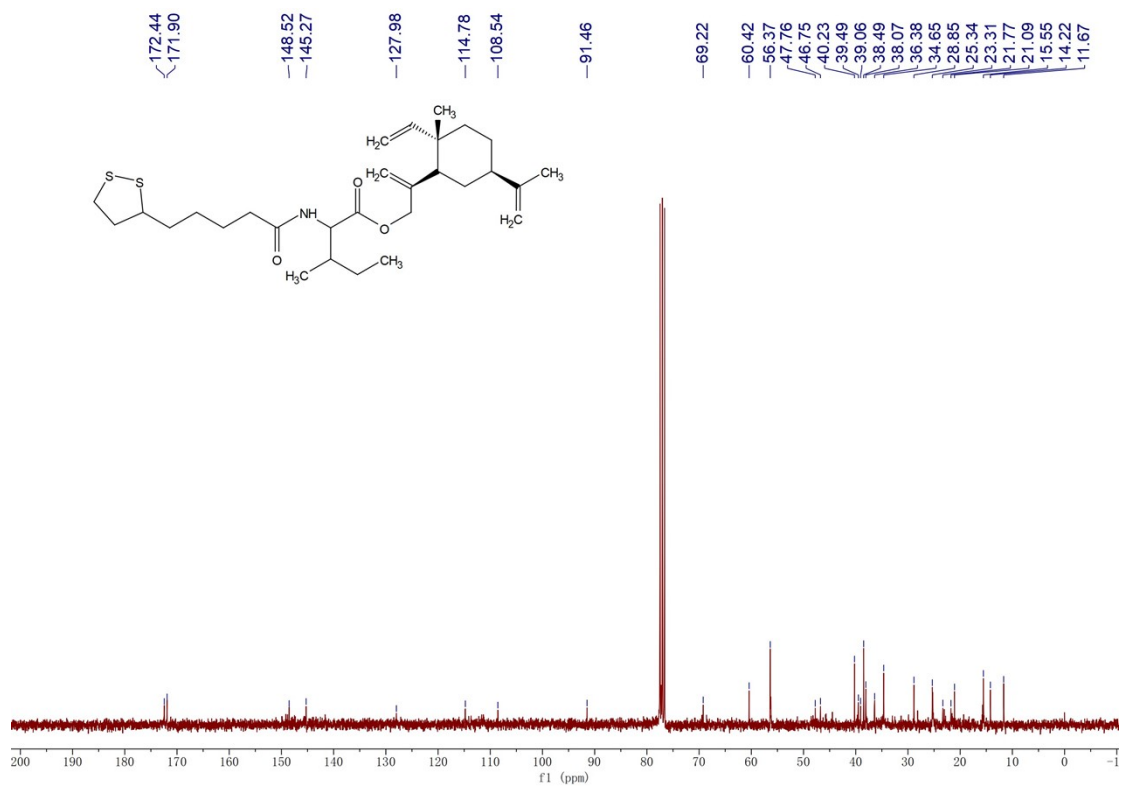

# HPLC purity profile of compound L13-2h

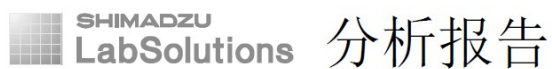

样品名：L13-2h  
方法文件名：95%MeCN+5%H2O

<色谱图>

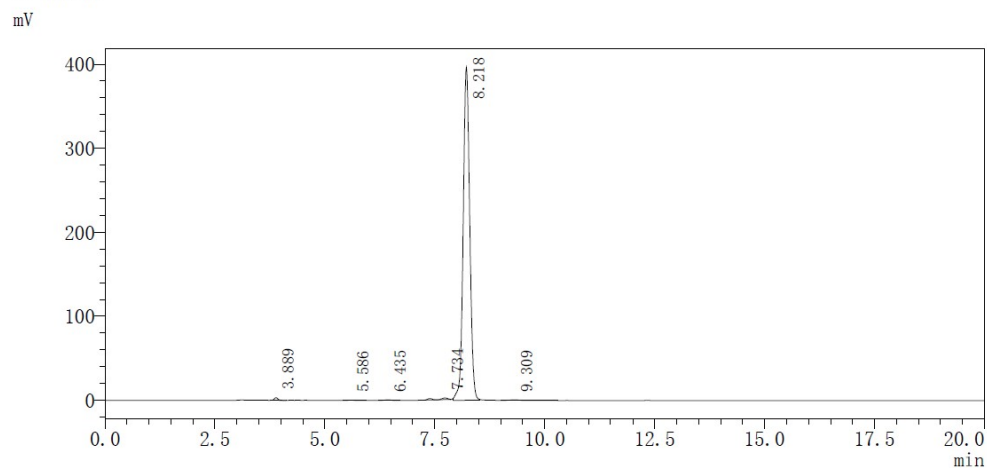

<峰表>

检测器A 254nm

| 峰号 | 保留时间  | 面积      | 高度     | 浓度     | 面积%     | 面积/高度  |
|----|-------|---------|--------|--------|---------|--------|
| 1  | 3.889 | 17676   | 3134   | 0.425  | 0.425   | 5.639  |
| 2  | 5.586 | 2394    | 249    | 0.058  | 0.058   | 9.609  |
| 3  | 6.435 | 6779    | 639    | 0.163  | 0.163   | 10.605 |
| 4  | 7.734 | 26364   | 1879   | 0.634  | 0.634   | 14.029 |
| 5  | 8.218 | 4090897 | 395994 | 98.390 | 98.390  | 10.331 |
| 6  | 9.309 | 13726   | 699    | 0.330  | 0.330   | 19.647 |
| 总计 |       | 4157836 | 402595 |        | 100.000 |        |
